# Supplementary material for: Signatures of Arithmetic Simplicity in Metabolic Network Architecture
Source: PubMed Central journal article supplement (PMC2848538; doi:10.1371/journal.pcbi.1000725), 2010-04-01
Supplement: pcbi.1000725.s002.pdf [file pcbi.1000725.s002.pdf]

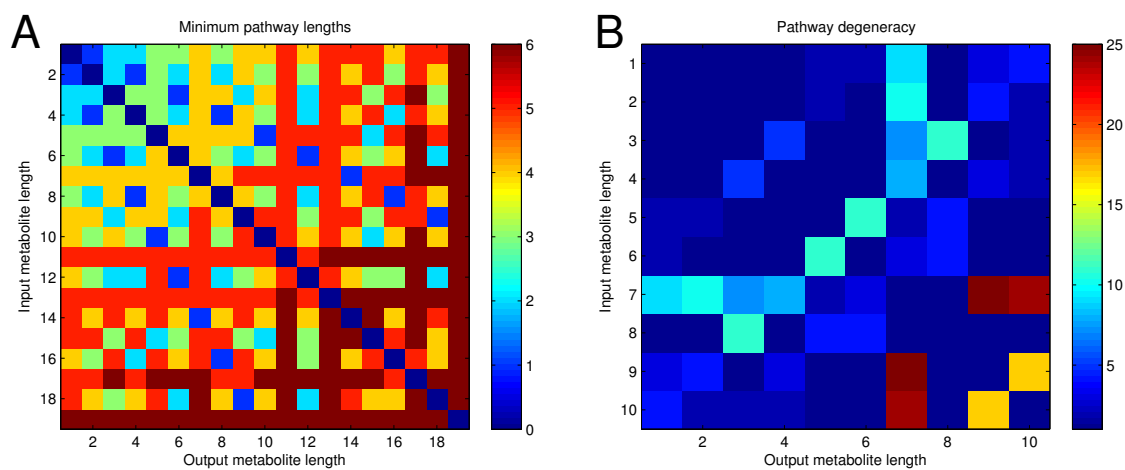

**Figure S2** (A) This heatmap matrix shows the number of reactions used in all MBPs in the  $R_{19}$  network. Each element  $(i, j)$  shows the length of the shortest path from  $a_i$  to  $a_j$ , not counting the transport reactions to allow entry of  $a_i$  or exit of  $a_j$ . For example, element  $(1, 1)$  ( $a_1 \Rightarrow a_1$ ) requires 0 reactions, while  $(1, 19)$  ( $a_1 \Rightarrow a_{19}$ ) requires 6 for a minimal pathway. (B) This heatmap shows how many MBPs with an equal number of reactions were calculated in the  $R_{10}$  network using the EFM method. Each element  $(i, j)$  shows how many MBPs exist to convert  $a_i$  to  $a_j$ . For example, There is only one path to convert  $a_1$  to  $a_2$ , but 25 that convert from  $a_7$  to  $a_9$ .
