# Supplementary material for: Signatures of Arithmetic Simplicity in Metabolic Network Architecture
Source: PubMed Central journal article supplement (PMC2848538; doi:10.1371/journal.pcbi.1000725), 2010-04-01
Supplement: pcbi.1000725.s005.pdf [file pcbi.1000725.s005.pdf]

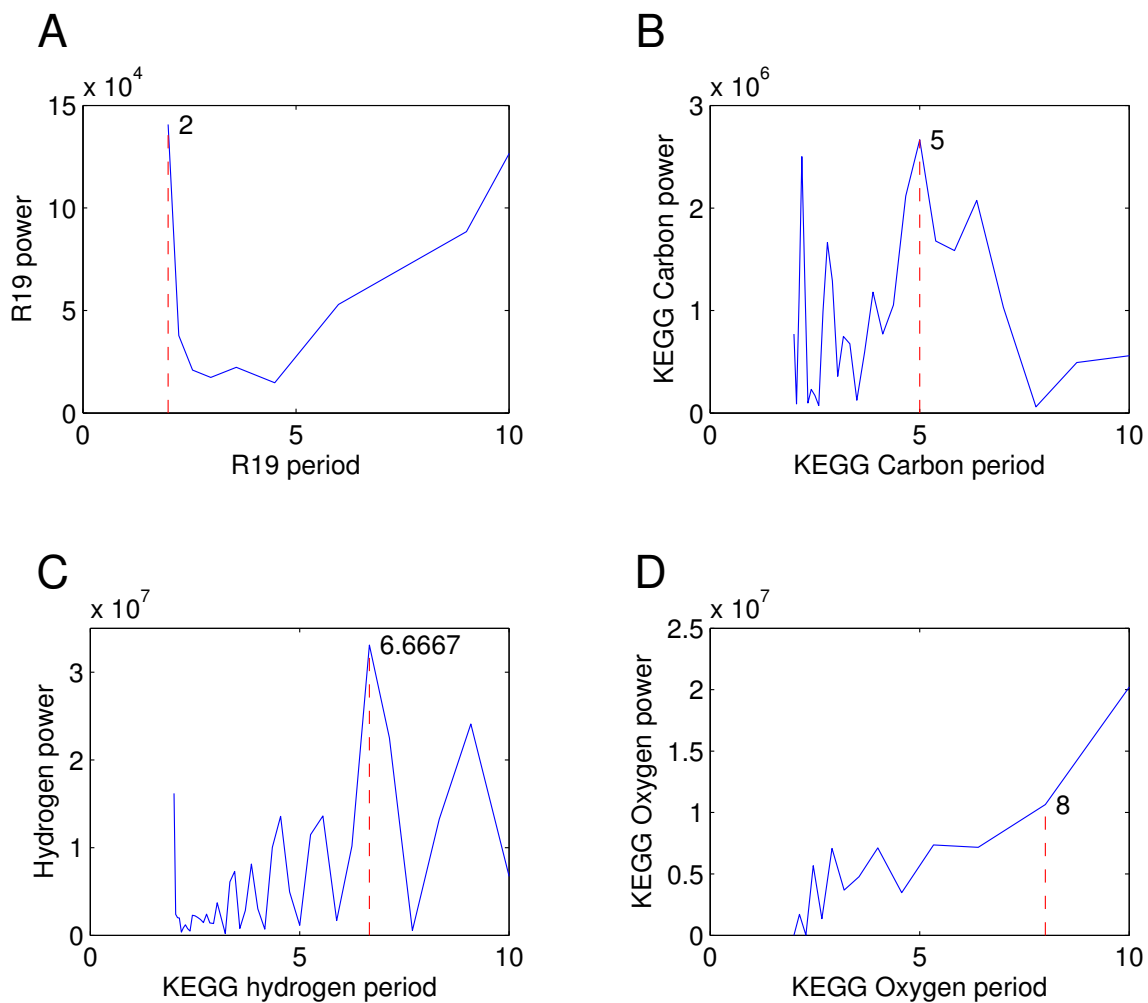

**Figure S5** A series of fast Fourier transforms to detect the period of metabolite usage in the  $R_{19}$ , KEGG carbon, nitrogen, and oxygen distributions. The highest peak of each period is labeled with the value. **(A)**  $R_{19}$  model. **(B)** KEGG carbon. **(C)** KEGG hydrogen. **(D)** KEGG oxygen.
