# Supplementary material for: Signatures of Arithmetic Simplicity in Metabolic Network Architecture
Source: PLoS Comput Biol. 2010 Apr 1;6(4):e1000725. doi: 10.1371/journal.pcbi.1000725 (PMC2848538; doi:10.1371/journal.pcbi.1000725)
Supplement: Table S3 — List of all degenerate MBPs found in the R10 network (0.07 MB XLS) [file pcbi.1000725.s012.xls]

## Sheet: R10 MBP list (EFM)
Input/output	Used reactions		This is a list of all MBPs calculated using the EFM algorithm. Each row is the list of reactions used with an arrow pointing in the direction of their use. Because this uses the EFM method, many MBPs (input/output) have multiple degenerate solutions. For example, there are two for a1 → a5 and nine for a1 → a7, but zero (left blank) for a1 → a1.
a1 → a1
a1 → a2	a1+a1→a2
a1 → a3	a1+a1→a2, a1+a2→a3
a1 → a4	a1+a1→a2, a2+a2→a4
a1 → a5	a1+a1→a2, a1+a2→a3, a2+a3→a5
	a1+a1→a2, a2+a2→a4, a1+a4→a5
a1 → a6	a1+a1→a2, a1+a2→a3, a3+a3→a6
	a1+a1→a2, a2+a2→a4, a2+a4→a6
a1 → a7	a1+a1→a2, a1+a2→a3, a3+a3→a6, a1+a6→a7
	a1+a1→a2, a1+a2→a3, a1+a3→a4, a3+a4→a7
	a1+a1→a2, a2+a2→a4, a2+a4→a6, a1+a6→a7
	a1+a1→a2, a1+a2→a3, a2+a2→a4, a3+a4→a7
	a1+a1→a2, a2+a2→a4, a8→a1+a7, a4+a4→a8
	a1+a1→a2, a1+a2→a3, a2+a3→a5, a2+a5→a7
	a1+a1→a2, a2+a2→a4, a1+a4→a5, a2+a5→a7
	a1+a1→a2, a4→a1+a3, a2+a2→a4, a3+a4→a7
	a1+a2→a3, a1+a3→a4, a4→a2+a2, a3+a4→a7
a1 → a8	a1+a1→a2, a2+a2→a4, a4+a4→a8
a1 → a9	a1+a1→a2, a2+a2→a4, a4+a4→a8, a1+a8→a9
	a1+a1→a2, a1+a2→a3, a3+a3→a6, a3+a6→a9
	a1+a1→a2, a2+a2→a4, a1+a4→a5, a4+a5→a9
a1 → a10	a1+a1→a2, a1+a2→a3, a2+a3→a5, a5+a5→a10
	a1+a1→a2, a2+a2→a4, a2+a4→a6, a4+a6→a10
	a1+a1→a2, a2+a2→a4, a4+a4→a8, a2+a8→a10
	a1+a1→a2, a2+a2→a4, a1+a4→a5, a5+a5→a10
a2 → a1	a2→a1+a1
a2 → a2
a2 → a3	a2→a1+a1, a1+a2→a3
a2 → a4	a2+a2→a4
a2 → a5	a2→a1+a1, a1+a2→a3, a2+a3→a5
	a2→a1+a1, a2+a2→a4, a1+a4→a5
a2 → a6	a2+a2→a4, a2+a4→a6
a2 → a7	a2→a1+a1, a1+a2→a3, a3+a3→a6, a1+a6→a7
	a2→a1+a1, a1+a2→a3, a1+a3→a4, a3+a4→a7
	a2→a1+a1, a2+a2→a4, a2+a4→a6, a1+a6→a7
	a2→a1+a1, a1+a2→a3, a2+a2→a4, a3+a4→a7
	a1+a1→a2, a2+a2→a4, a8→a1+a7, a4+a4→a8
	a2→a1+a1, a1+a2→a3, a2+a3→a5, a2+a5→a7
	a2→a1+a1, a2+a2→a4, a1+a4→a5, a2+a5→a7
	a1+a1→a2, a4→a1+a3, a2+a2→a4, a3+a4→a7
	a2+a2→a4, a2+a4→a6, a6→a3+a3, a3+a4→a7
	a1+a2→a3, a4→a1+a3, a2+a2→a4, a3+a4→a7
a2 → a8	a2+a2→a4, a4+a4→a8
a2 → a9	a2→a1+a1, a2+a2→a4, a4+a4→a8, a1+a8→a9
	a2→a1+a1, a1+a2→a3, a3+a3→a6, a3+a6→a9
	a2→a1+a1, a2+a2→a4, a1+a4→a5, a4+a5→a9
	a2+a2→a4, a2+a4→a6, a6→a3+a3, a3+a6→a9
a2 → a10	a2+a2→a4, a2+a4→a6, a4+a6→a10
	a2+a2→a4, a4+a4→a8, a2+a8→a10
a3 → a1	a2→a1+a1, a3→a1+a2
a3 → a2	a1+a1→a2, a3→a1+a2
a3 → a3
a3 → a4	a2→a1+a1, a3→a1+a2, a1+a3→a4
	a1+a1→a2, a3→a1+a2, a2+a2→a4
	a2→a1+a1, a1+a3→a4, a4→a2+a2
	a2+a2→a4, a6→a2+a4, a3+a3→a6
	a3→a1+a2, a1+a3→a4, a2+a2→a4
a3 → a5	a1+a1→a2, a3→a1+a2, a2+a3→a5
a3 → a6	a3+a3→a6
a3 → a7	a2→a1+a1, a3→a1+a2, a3+a3→a6, a1+a6→a7
	a2→a1+a1, a3→a1+a2, a1+a3→a4, a3+a4→a7
	a1+a1→a2, a3→a1+a2, a2+a2→a4, a3+a4→a7
	a1+a1→a2, a3→a1+a2, a2+a3→a5, a2+a5→a7
	a2→a1+a1, a1+a3→a4, a4→a2+a2, a3+a4→a7
	a2+a2→a4, a6→a2+a4, a3+a3→a6, a3+a4→a7
	a3→a1+a2, a1+a3→a4, a2+a2→a4, a3+a4→a7
a3 → a8	a2→a1+a1, a3→a1+a2, a1+a3→a4, a4+a4→a8
	a1+a1→a2, a3→a1+a2, a2+a2→a4, a4+a4→a8
	a1+a1→a2, a3→a1+a2, a2+a3→a5, a3+a5→a8
	a1+a1→a2, a3→a1+a2, a3+a3→a6, a2+a6→a8
	a2→a1+a1, a1+a3→a4, a4→a2+a2, a4+a4→a8
	a4→a2+a2, a2+a3→a5, a3+a5→a8, a8→a4+a4
	a4→a2+a2, a6→a2+a4, a3+a3→a6, a2+a6→a8
	a2+a2→a4, a6→a2+a4, a3+a3→a6, a4+a4→a8
	a4→a2+a2, a3+a3→a6, a2+a6→a8, a8→a4+a4
	a6→a2+a4, a3+a3→a6, a2+a6→a8, a4+a4→a8
	a3→a1+a2, a1+a3→a4, a2+a2→a4, a4+a4→a8
a3 → a9	a3+a3→a6, a3+a6→a9
a3 → a10	a1+a1→a2, a3→a1+a2, a2+a3→a5, a5+a5→a10
	a2+a2→a4, a6→a2+a4, a3+a3→a6, a4+a6→a10
a4 → a1	a2→a1+a1, a4→a2+a2
a4 → a2	a4→a2+a2
a4 → a3	a1+a1→a2, a1+a2→a3, a4→a1+a3
	a2→a1+a1, a1+a2→a3, a4→a2+a2
	a1+a1→a2, a4→a1+a3, a2+a2→a4
	a4→a2+a2, a2+a4→a6, a6→a3+a3
	a1+a2→a3, a4→a1+a3, a4→a2+a2
a4 → a4
a4 → a5	a2→a1+a1, a4→a2+a2, a1+a4→a5
a4 → a6	a4→a2+a2, a2+a4→a6
a4 → a7	a1+a1→a2, a1+a2→a3, a4→a1+a3, a3+a4→a7
	a2→a1+a1, a4→a2+a2, a2+a4→a6, a1+a6→a7
	a2→a1+a1, a1+a2→a3, a4→a2+a2, a3+a4→a7
	a1+a1→a2, a2+a2→a4, a8→a1+a7, a4+a4→a8
	a2→a1+a1, a4→a2+a2, a1+a4→a5, a2+a5→a7
	a1+a1→a2, a4→a1+a3, a2+a2→a4, a3+a4→a7
	a4→a2+a2, a2+a4→a6, a6→a3+a3, a3+a4→a7
	a1+a2→a3, a4→a1+a3, a4→a2+a2, a3+a4→a7
a4 → a8	a4+a4→a8
a4 → a9	a2→a1+a1, a4→a2+a2, a4+a4→a8, a1+a8→a9
	a2→a1+a1, a4→a2+a2, a1+a4→a5, a4+a5→a9
	a4→a2+a2, a2+a4→a6, a6→a3+a3, a3+a6→a9
a4 → a10	a4→a2+a2, a2+a4→a6, a4+a6→a10
	a4→a2+a2, a4+a4→a8, a2+a8→a10
a5 → a1	a2→a1+a1, a3→a1+a2, a5→a2+a3
	a2→a1+a1, a4→a2+a2, a5→a1+a4
a5 → a2	a1+a1→a2, a3→a1+a2, a5→a2+a3
	a1+a1→a2, a4→a2+a2, a5→a1+a4
a5 → a3	a2→a1+a1, a1+a2→a3, a5→a2+a3
a5 → a4	a1+a1→a2, a2+a2→a4, a5→a1+a4
a5 → a5
a5 → a6	a2→a1+a1, a3→a1+a2, a5→a2+a3, a1+a5→a6
	a2→a1+a1, a3→a1+a2, a1+a5→a6, a6→a3+a3
	a2→a1+a1, a4→a2+a2, a1+a5→a6, a6→a2+a4
	a2→a1+a1, a4→a2+a2, a5→a1+a4, a1+a5→a6
	a2→a1+a1, a1+a2→a3, a5→a2+a3, a3+a3→a6
	a1+a1→a2, a4→a2+a2, a5→a1+a4, a2+a4→a6
	a4→a2+a2, a2+a4→a6, a10→a4+a6, a5+a5→a10
	a2→a1+a1, a5→a2+a3, a1+a5→a6, a3+a3→a6
	a2+a2→a4, a5→a2+a3, a2+a4→a6, a3+a3→a6
	a4→a1+a3, a5→a1+a4, a1+a5→a6, a3+a3→a6
	a4→a2+a2, a5→a1+a4, a1+a5→a6, a2+a4→a6
a5 → a7	a1+a1→a2, a3→a1+a2, a5→a2+a3, a2+a5→a7
	a1+a1→a2, a4→a2+a2, a5→a1+a4, a2+a5→a7
a5 → a8	a2→a1+a1, a1+a2→a3, a5→a2+a3, a3+a5→a8
	a1+a1→a2, a2+a2→a4, a5→a1+a4, a4+a4→a8
	a2+a2→a4, a4+a4→a8, a10→a2+a8, a5+a5→a10
	a2+a2→a4, a5→a2+a3, a3+a5→a8, a4+a4→a8
a5 → a9	a1+a1→a2, a2+a2→a4, a5→a1+a4, a4+a5→a9
a5 → a10	a5+a5→a10
a6 → a1	a2→a1+a1, a3→a1+a2, a6→a3+a3
	a2→a1+a1, a4→a2+a2, a6→a2+a4
a6 → a2	a4→a2+a2, a6→a2+a4
a6 → a3	a6→a3+a3
a6 → a4	a2+a2→a4, a6→a2+a4
a6 → a5	a1+a1→a2, a1+a2→a3, a2+a3→a5, a6→a1+a5
	a1+a1→a2, a1+a2→a3, a6→a1+a5, a3+a3→a6
	a1+a1→a2, a2+a2→a4, a6→a1+a5, a2+a4→a6
	a1+a1→a2, a2+a2→a4, a1+a4→a5, a6→a1+a5
	a1+a1→a2, a3→a1+a2, a2+a3→a5, a6→a3+a3
	a2→a1+a1, a2+a2→a4, a1+a4→a5, a6→a2+a4
	a2+a2→a4, a6→a2+a4, a4+a6→a10, a10→a5+a5
	a1+a1→a2, a2+a3→a5, a6→a1+a5, a6→a3+a3
	a4→a2+a2, a2+a3→a5, a6→a2+a4, a6→a3+a3
	a1+a3→a4, a1+a4→a5, a6→a1+a5, a6→a3+a3
	a2+a2→a4, a1+a4→a5, a6→a1+a5, a6→a2+a4
a6 → a6
a6 → a7	a2→a1+a1, a3→a1+a2, a6→a3+a3, a1+a6→a7
	a2→a1+a1, a4→a2+a2, a6→a2+a4, a1+a6→a7
	a2+a2→a4, a6→a2+a4, a6→a3+a3, a3+a4→a7
a6 → a8	a4→a2+a2, a6→a2+a4, a2+a6→a8
	a2+a2→a4, a6→a2+a4, a4+a4→a8
	a4→a2+a2, a2+a6→a8, a8→a4+a4
	a6→a2+a4, a2+a6→a8, a4+a4→a8
a6 → a9	a6→a3+a3, a3+a6→a9
a6 → a10	a2+a2→a4, a6→a2+a4, a4+a6→a10
a7 → a1	a2→a1+a1, a3→a1+a2, a6→a3+a3, a7→a1+a6
	a2→a1+a1, a3→a1+a2, a4→a1+a3, a7→a3+a4
	a2→a1+a1, a4→a2+a2, a6→a2+a4, a7→a1+a6
	a2→a1+a1, a3→a1+a2, a4→a2+a2, a7→a3+a4
	a2→a1+a1, a4→a2+a2, a1+a7→a8, a8→a4+a4
	a2→a1+a1, a3→a1+a2, a5→a2+a3, a7→a2+a5
	a2→a1+a1, a4→a2+a2, a5→a1+a4, a7→a2+a5
	a2→a1+a1, a1+a3→a4, a4→a2+a2, a7→a3+a4
	a3→a1+a2, a4→a1+a3, a2+a2→a4, a7→a3+a4
a7 → a2	a1+a1→a2, a3→a1+a2, a6→a3+a3, a7→a1+a6
	a1+a1→a2, a3→a1+a2, a4→a1+a3, a7→a3+a4
	a1+a1→a2, a4→a2+a2, a6→a2+a4, a7→a1+a6
	a1+a1→a2, a3→a1+a2, a4→a2+a2, a7→a3+a4
	a2→a1+a1, a4→a2+a2, a1+a7→a8, a8→a4+a4
	a1+a1→a2, a3→a1+a2, a5→a2+a3, a7→a2+a5
	a1+a1→a2, a4→a2+a2, a5→a1+a4, a7→a2+a5
	a2→a1+a1, a1+a3→a4, a4→a2+a2, a7→a3+a4
	a4→a2+a2, a6→a2+a4, a3+a3→a6, a7→a3+a4
	a3→a1+a2, a1+a3→a4, a4→a2+a2, a7→a3+a4
a7 → a3	a1+a1→a2, a1+a2→a3, a6→a3+a3, a7→a1+a6
	a1+a1→a2, a1+a2→a3, a4→a1+a3, a7→a3+a4
	a2→a1+a1, a1+a2→a3, a4→a2+a2, a7→a3+a4
	a2→a1+a1, a1+a2→a3, a5→a2+a3, a7→a2+a5
	a1+a1→a2, a4→a1+a3, a2+a2→a4, a7→a3+a4
	a4→a2+a2, a2+a4→a6, a6→a3+a3, a7→a3+a4
	a1+a2→a3, a4→a1+a3, a4→a2+a2, a7→a3+a4
a7 → a4	a2→a1+a1, a3→a1+a2, a1+a3→a4, a7→a3+a4
	a1+a1→a2, a2+a2→a4, a6→a2+a4, a7→a1+a6
	a1+a1→a2, a3→a1+a2, a2+a2→a4, a7→a3+a4
	a2→a1+a1, a4→a2+a2, a1+a7→a8, a8→a4+a4
	a1+a1→a2, a2+a2→a4, a5→a1+a4, a7→a2+a5
	a2→a1+a1, a1+a3→a4, a4→a2+a2, a7→a3+a4
	a2+a2→a4, a6→a2+a4, a3+a3→a6, a7→a3+a4
	a3→a1+a2, a1+a3→a4, a2+a2→a4, a7→a3+a4
a7 → a5	a2→a1+a1, a1+a2→a3, a2+a3→a5, a7→a2+a5
	a2→a1+a1, a2+a2→a4, a1+a4→a5, a7→a2+a5
a7 → a6	a1+a1→a2, a1+a2→a3, a3+a3→a6, a7→a1+a6
	a1+a1→a2, a2+a2→a4, a2+a4→a6, a7→a1+a6
	a4→a2+a2, a2+a4→a6, a3+a3→a6, a7→a3+a4
a7 → a7
a7 → a8	a2→a1+a1, a4→a2+a2, a1+a7→a8, a8→a4+a4
a7 → a9	a2→a1+a1, a4→a2+a2, a1+a7→a8, a8→a4+a4, a1+a8→a9
	a1+a1→a2, a3→a1+a2, a6→a3+a3, a7→a1+a6, a2+a7→a9
	a1+a1→a2, a1+a2→a3, a6→a3+a3, a7→a1+a6, a3+a6→a9
	a1+a1→a2, a4→a2+a2, a6→a2+a4, a7→a1+a6, a2+a7→a9
	a1+a1→a2, a3→a1+a2, a4→a2+a2, a7→a3+a4, a2+a7→a9
	a2→a1+a1, a4→a2+a2, a1+a7→a8, a8→a4+a4, a2+a7→a9
	a1+a1→a2, a3→a1+a2, a4→a1+a3, a7→a3+a4, a2+a7→a9
	a1+a1→a2, a3→a1+a2, a5→a2+a3, a7→a2+a5, a2+a7→a9
	a1+a1→a2, a4→a2+a2, a5→a1+a4, a7→a2+a5, a2+a7→a9
	a1+a1→a2, a2+a2→a4, a5→a1+a4, a7→a2+a5, a4+a5→a9
	a1+a1→a2, a4→a2+a2, a5→a1+a4, a2+a7→a9, a9→a4+a5
	a1+a1→a2, a5→a1+a4, a7→a2+a5, a2+a7→a9, a4+a5→a9
	a1+a1→a2, a7→a2+a5, a2+a7→a9, a10→a1+a9, a5+a5→a10
	a1+a1→a2, a3→a1+a2, a6→a3+a3, a2+a7→a9, a9→a3+a6
	a1+a1→a2, a4→a2+a2, a8→a4+a4, a9→a1+a8, a2+a7→a9
	a2→a1+a1, a1+a3→a4, a4→a2+a2, a7→a3+a4, a2+a7→a9
	a1+a1→a2, a6→a3+a3, a7→a1+a6, a2+a7→a9, a3+a6→a9
	a4→a2+a2, a6→a2+a4, a3+a3→a6, a7→a3+a4, a2+a7→a9
	a4→a2+a2, a2+a4→a6, a3+a3→a6, a7→a3+a4, a3+a6→a9
	a4→a2+a2, a6→a2+a4, a3+a3→a6, a2+a7→a9, a9→a3+a6
	a4→a2+a2, a3+a3→a6, a7→a3+a4, a2+a7→a9, a3+a6→a9
	a5→a2+a3, a3+a3→a6, a7→a2+a5, a2+a7→a9, a3+a6→a9
	a6→a3+a3, a7→a1+a6, a1+a7→a8, a1+a8→a9, a3+a6→a9
	a3→a1+a2, a1+a3→a4, a4→a2+a2, a7→a3+a4, a2+a7→a9
	a4→a2+a2, a1+a7→a8, a8→a4+a4, a9→a1+a8, a2+a7→a9
a7 → a10	a1+a1→a2, a1+a2→a3, a6→a3+a3, a7→a1+a6, a3+a7→a10
	a1+a1→a2, a1+a2→a3, a4→a1+a3, a7→a3+a4, a3+a7→a10
	a1+a1→a2, a2+a2→a4, a6→a2+a4, a7→a1+a6, a4+a6→a10
	a2→a1+a1, a1+a2→a3, a4→a2+a2, a7→a3+a4, a3+a7→a10
	a2→a1+a1, a4→a2+a2, a1+a7→a8, a8→a4+a4, a2+a8→a10
	a2→a1+a1, a1+a2→a3, a5→a2+a3, a7→a2+a5, a3+a7→a10
	a2→a1+a1, a1+a2→a3, a2+a3→a5, a7→a2+a5, a5+a5→a10
	a2→a1+a1, a1+a2→a3, a5→a2+a3, a3+a7→a10, a10→a5+a5
	a2→a1+a1, a7→a2+a5, a1+a7→a8, a2+a8→a10, a5+a5→a10
	a2→a1+a1, a1+a2→a3, a7→a2+a5, a3+a7→a10, a5+a5→a10
	a2→a1+a1, a2+a2→a4, a1+a4→a5, a7→a2+a5, a5+a5→a10
	a2→a1+a1, a7→a2+a5, a2+a7→a9, a1+a9→a10, a5+a5→a10
	a2+a2→a4, a2+a4→a6, a7→a2+a5, a4+a6→a10, a5+a5→a10
	a2+a2→a4, a7→a2+a5, a4+a4→a8, a2+a8→a10, a5+a5→a10
	a7→a3+a4, a8→a3+a5, a4+a4→a8, a3+a7→a10, a5+a5→a10
	a1+a1→a2, a4→a1+a3, a2+a2→a4, a7→a3+a4, a3+a7→a10
	a4→a2+a2, a2+a4→a6, a6→a3+a3, a7→a3+a4, a3+a7→a10
	a4→a2+a2, a2+a4→a6, a3+a3→a6, a7→a3+a4, a4+a6→a10
	a4→a2+a2, a2+a4→a6, a6→a3+a3, a3+a7→a10, a10→a4+a6
	a4→a2+a2, a2+a4→a6, a7→a3+a4, a3+a7→a10, a4+a6→a10
	a4→a2+a2, a7→a3+a4, a4+a4→a8, a2+a8→a10, a3+a7→a10
	a1+a5→a6, a6→a3+a3, a7→a1+a6, a3+a7→a10, a10→a5+a5
	a4→a1+a3, a1+a4→a5, a7→a3+a4, a3+a7→a10, a5+a5→a10
	a1+a2→a3, a4→a1+a3, a4→a2+a2, a7→a3+a4, a3+a7→a10
a8 → a1	a2→a1+a1, a4→a2+a2, a8→a4+a4
a8 → a2	a4→a2+a2, a8→a4+a4
a8 → a3	a1+a1→a2, a1+a2→a3, a4→a1+a3, a8→a4+a4
	a2→a1+a1, a1+a2→a3, a4→a2+a2, a8→a4+a4
	a2→a1+a1, a1+a2→a3, a5→a2+a3, a8→a3+a5
	a2→a1+a1, a1+a2→a3, a6→a3+a3, a8→a2+a6
	a1+a1→a2, a4→a1+a3, a2+a2→a4, a8→a4+a4
	a2+a2→a4, a5→a2+a3, a8→a3+a5, a4+a4→a8
	a2+a2→a4, a2+a4→a6, a6→a3+a3, a8→a2+a6
	a4→a2+a2, a2+a4→a6, a6→a3+a3, a8→a4+a4
	a2+a2→a4, a6→a3+a3, a8→a2+a6, a4+a4→a8
	a2+a4→a6, a6→a3+a3, a8→a2+a6, a8→a4+a4
	a1+a2→a3, a4→a1+a3, a4→a2+a2, a8→a4+a4
a8 → a4	a8→a4+a4
a8 → a5	a1+a1→a2, a3→a1+a2, a2+a3→a5, a8→a3+a5
	a2→a1+a1, a4→a2+a2, a1+a4→a5, a8→a4+a4
	a4→a2+a2, a8→a4+a4, a2+a8→a10, a10→a5+a5
	a4→a2+a2, a2+a3→a5, a8→a3+a5, a8→a4+a4
a8 → a6	a2+a2→a4, a2+a4→a6, a8→a2+a6
	a4→a2+a2, a2+a4→a6, a8→a4+a4
	a2+a2→a4, a8→a2+a6, a4+a4→a8
	a2+a4→a6, a8→a2+a6, a8→a4+a4
a8 → a7	a1+a1→a2, a2+a2→a4, a8→a1+a7, a4+a4→a8
a8 → a8
a8 → a9	a2→a1+a1, a4→a2+a2, a8→a4+a4, a1+a8→a9
a8 → a10	a4→a2+a2, a8→a4+a4, a2+a8→a10
a9 → a1	a2→a1+a1, a4→a2+a2, a8→a4+a4, a9→a1+a8
	a2→a1+a1, a3→a1+a2, a6→a3+a3, a9→a3+a6
	a2→a1+a1, a4→a2+a2, a5→a1+a4, a9→a4+a5
a9 → a2	a1+a1→a2, a4→a2+a2, a8→a4+a4, a9→a1+a8
	a1+a1→a2, a3→a1+a2, a6→a3+a3, a9→a3+a6
	a1+a1→a2, a4→a2+a2, a5→a1+a4, a9→a4+a5
	a4→a2+a2, a6→a2+a4, a3+a3→a6, a9→a3+a6
a9 → a3	a6→a3+a3, a9→a3+a6
a9 → a4	a1+a1→a2, a2+a2→a4, a8→a4+a4, a9→a1+a8
	a1+a1→a2, a2+a2→a4, a5→a1+a4, a9→a4+a5
	a2+a2→a4, a6→a2+a4, a3+a3→a6, a9→a3+a6
a9 → a5	a2→a1+a1, a4→a2+a2, a1+a4→a5, a9→a4+a5
a9 → a6	a3+a3→a6, a9→a3+a6
a9 → a7	a1+a1→a2, a2+a2→a4, a8→a1+a7, a4+a4→a8, a9→a1+a8
	a2→a1+a1, a1+a2→a3, a3+a3→a6, a1+a6→a7, a9→a2+a7
	a2→a1+a1, a3→a1+a2, a3+a3→a6, a1+a6→a7, a9→a3+a6
	a2→a1+a1, a2+a2→a4, a2+a4→a6, a1+a6→a7, a9→a2+a7
	a2→a1+a1, a1+a2→a3, a2+a2→a4, a3+a4→a7, a9→a2+a7
	a1+a1→a2, a2+a2→a4, a8→a1+a7, a4+a4→a8, a9→a2+a7
	a2→a1+a1, a1+a2→a3, a1+a3→a4, a3+a4→a7, a9→a2+a7
	a2→a1+a1, a1+a2→a3, a2+a3→a5, a2+a5→a7, a9→a2+a7
	a2→a1+a1, a2+a2→a4, a1+a4→a5, a2+a5→a7, a9→a2+a7
	a2→a1+a1, a4→a2+a2, a1+a4→a5, a2+a5→a7, a9→a4+a5
	a2→a1+a1, a2+a2→a4, a1+a4→a5, a9→a2+a7, a4+a5→a9
	a2→a1+a1, a1+a4→a5, a2+a5→a7, a9→a2+a7, a9→a4+a5
	a2→a1+a1, a2+a5→a7, a9→a2+a7, a1+a9→a10, a10→a5+a5
	a2→a1+a1, a1+a2→a3, a3+a3→a6, a9→a2+a7, a3+a6→a9
	a2→a1+a1, a2+a2→a4, a4+a4→a8, a1+a8→a9, a9→a2+a7
	a1+a1→a2, a4→a1+a3, a2+a2→a4, a3+a4→a7, a9→a2+a7
	a2→a1+a1, a3+a3→a6, a1+a6→a7, a9→a2+a7, a9→a3+a6
	a2+a2→a4, a2+a4→a6, a6→a3+a3, a3+a4→a7, a9→a2+a7
	a2+a2→a4, a6→a2+a4, a6→a3+a3, a3+a4→a7, a9→a3+a6
	a2+a2→a4, a2+a4→a6, a6→a3+a3, a9→a2+a7, a3+a6→a9
	a2+a2→a4, a6→a3+a3, a3+a4→a7, a9→a2+a7, a9→a3+a6
	a2+a3→a5, a6→a3+a3, a2+a5→a7, a9→a2+a7, a9→a3+a6
	a3+a3→a6, a1+a6→a7, a8→a1+a7, a9→a1+a8, a9→a3+a6
	a1+a2→a3, a4→a1+a3, a2+a2→a4, a3+a4→a7, a9→a2+a7
	a2+a2→a4, a8→a1+a7, a4+a4→a8, a1+a8→a9, a9→a2+a7
a9 → a8	a1+a1→a2, a2+a2→a4, a4+a4→a8, a9→a1+a8
a9 → a9
a9 → a10	a1+a1→a2, a4→a2+a2, a8→a4+a4, a9→a1+a8, a2+a8→a10
	a2→a1+a1, a4→a2+a2, a8→a4+a4, a9→a1+a8, a1+a9→a10
	a2→a1+a1, a3→a1+a2, a5→a2+a3, a1+a9→a10, a10→a5+a5
	a2→a1+a1, a3→a1+a2, a6→a3+a3, a9→a3+a6, a1+a9→a10
	a2→a1+a1, a4→a2+a2, a6→a2+a4, a1+a9→a10, a10→a4+a6
	a2→a1+a1, a4→a2+a2, a8→a4+a4, a1+a9→a10, a10→a2+a8
	a2→a1+a1, a4→a2+a2, a9→a4+a5, a1+a9→a10, a5+a5→a10
	a2→a1+a1, a4→a2+a2, a1+a4→a5, a9→a4+a5, a5+a5→a10
	a2→a1+a1, a4→a2+a2, a5→a1+a4, a9→a4+a5, a1+a9→a10
	a2→a1+a1, a4→a2+a2, a5→a1+a4, a1+a9→a10, a10→a5+a5
	a2→a1+a1, a7→a2+a5, a9→a2+a7, a1+a9→a10, a5+a5→a10
	a4→a2+a2, a2+a4→a6, a9→a4+a5, a4+a6→a10, a5+a5→a10
	a4→a2+a2, a4+a4→a8, a9→a4+a5, a2+a8→a10, a5+a5→a10
	a3+a3→a6, a9→a3+a6, a9→a4+a5, a4+a6→a10, a5+a5→a10
	a2+a2→a4, a6→a2+a4, a3+a3→a6, a9→a3+a6, a4+a6→a10
	a6→a1+a5, a3+a3→a6, a9→a3+a6, a1+a9→a10, a5+a5→a10
	a4→a2+a2, a8→a4+a4, a9→a1+a8, a1+a9→a10, a2+a8→a10
a10 → a1	a2→a1+a1, a3→a1+a2, a5→a2+a3, a10→a5+a5
	a2→a1+a1, a4→a2+a2, a6→a2+a4, a10→a4+a6
	a2→a1+a1, a4→a2+a2, a8→a4+a4, a10→a2+a8
	a2→a1+a1, a4→a2+a2, a5→a1+a4, a10→a5+a5
a10 → a2	a4→a2+a2, a6→a2+a4, a10→a4+a6
	a4→a2+a2, a8→a4+a4, a10→a2+a8
a10 → a3	a2→a1+a1, a1+a2→a3, a5→a2+a3, a10→a5+a5
	a4→a2+a2, a2+a4→a6, a6→a3+a3, a10→a4+a6
a10 → a4	a2+a2→a4, a6→a2+a4, a10→a4+a6
	a2+a2→a4, a8→a4+a4, a10→a2+a8
a10 → a5	a10→a5+a5
a10 → a6	a4→a2+a2, a2+a4→a6, a10→a4+a6
a10 → a7	a2→a1+a1, a3→a1+a2, a3+a3→a6, a1+a6→a7, a10→a3+a7
	a2→a1+a1, a3→a1+a2, a1+a3→a4, a3+a4→a7, a10→a3+a7
	a2→a1+a1, a4→a2+a2, a2+a4→a6, a1+a6→a7, a10→a4+a6
	a1+a1→a2, a3→a1+a2, a2+a2→a4, a3+a4→a7, a10→a3+a7
	a1+a1→a2, a2+a2→a4, a8→a1+a7, a4+a4→a8, a10→a2+a8
	a1+a1→a2, a3→a1+a2, a2+a3→a5, a2+a5→a7, a10→a3+a7
	a1+a1→a2, a3→a1+a2, a5→a2+a3, a2+a5→a7, a10→a5+a5
	a1+a1→a2, a3→a1+a2, a2+a3→a5, a10→a3+a7, a5+a5→a10
	a1+a1→a2, a2+a5→a7, a8→a1+a7, a10→a2+a8, a10→a5+a5
	a1+a1→a2, a3→a1+a2, a2+a5→a7, a10→a3+a7, a10→a5+a5
	a1+a1→a2, a4→a2+a2, a5→a1+a4, a2+a5→a7, a10→a5+a5
	a1+a1→a2, a2+a5→a7, a9→a2+a7, a10→a1+a9, a10→a5+a5
	a4→a2+a2, a6→a2+a4, a2+a5→a7, a10→a4+a6, a10→a5+a5
	a4→a2+a2, a2+a5→a7, a8→a4+a4, a10→a2+a8, a10→a5+a5
	a3+a4→a7, a3+a5→a8, a8→a4+a4, a10→a3+a7, a10→a5+a5
	a2→a1+a1, a1+a3→a4, a4→a2+a2, a3+a4→a7, a10→a3+a7
	a2+a2→a4, a6→a2+a4, a3+a3→a6, a3+a4→a7, a10→a3+a7
	a2+a2→a4, a6→a2+a4, a6→a3+a3, a3+a4→a7, a10→a4+a6
	a2+a2→a4, a6→a2+a4, a3+a3→a6, a10→a3+a7, a4+a6→a10
	a2+a2→a4, a6→a2+a4, a3+a4→a7, a10→a3+a7, a10→a4+a6
	a2+a2→a4, a3+a4→a7, a8→a4+a4, a10→a2+a8, a10→a3+a7
	a6→a1+a5, a3+a3→a6, a1+a6→a7, a10→a3+a7, a5+a5→a10
	a1+a3→a4, a5→a1+a4, a3+a4→a7, a10→a3+a7, a10→a5+a5
	a3→a1+a2, a1+a3→a4, a2+a2→a4, a3+a4→a7, a10→a3+a7
a10 → a8	a2+a2→a4, a4+a4→a8, a10→a2+a8
a10 → a9	a2→a1+a1, a2+a2→a4, a4+a4→a8, a1+a8→a9, a10→a2+a8
	a1+a1→a2, a2+a2→a4, a4+a4→a8, a1+a8→a9, a10→a1+a9
	a1+a1→a2, a1+a2→a3, a2+a3→a5, a10→a1+a9, a5+a5→a10
	a1+a1→a2, a1+a2→a3, a3+a3→a6, a3+a6→a9, a10→a1+a9
	a1+a1→a2, a2+a2→a4, a2+a4→a6, a10→a1+a9, a4+a6→a10
	a1+a1→a2, a2+a2→a4, a4+a4→a8, a10→a1+a9, a2+a8→a10
	a1+a1→a2, a2+a2→a4, a4+a5→a9, a10→a1+a9, a10→a5+a5
	a1+a1→a2, a2+a2→a4, a5→a1+a4, a4+a5→a9, a10→a5+a5
	a1+a1→a2, a2+a2→a4, a1+a4→a5, a4+a5→a9, a10→a1+a9
	a1+a1→a2, a2+a2→a4, a1+a4→a5, a10→a1+a9, a5+a5→a10
	a1+a1→a2, a2+a5→a7, a2+a7→a9, a10→a1+a9, a10→a5+a5
	a2+a2→a4, a6→a2+a4, a4+a5→a9, a10→a4+a6, a10→a5+a5
	a2+a2→a4, a8→a4+a4, a4+a5→a9, a10→a2+a8, a10→a5+a5
	a6→a3+a3, a3+a6→a9, a4+a5→a9, a10→a4+a6, a10→a5+a5
	a4→a2+a2, a2+a4→a6, a6→a3+a3, a3+a6→a9, a10→a4+a6
	a1+a5→a6, a6→a3+a3, a3+a6→a9, a10→a1+a9, a10→a5+a5
	a2+a2→a4, a4+a4→a8, a1+a8→a9, a10→a1+a9, a10→a2+a8
a10 → a10
