# Supplementary material for: Signatures of Arithmetic Simplicity in Metabolic Network Architecture
Source: PLoS Comput Biol. 2010 Apr 1;6(4):e1000725. doi: 10.1371/journal.pcbi.1000725 (PMC2848538; doi:10.1371/journal.pcbi.1000725)
Supplement: Table S7 — Metabolite and reaction usage from the KEGG hydrogen dataset (0.17 MB XLS) [file pcbi.1000725.s016.xls]

## Sheet: KEGG Hydrogen
	Hydrogen metabolite	Count			Hydrogen reaction	Count		A count of how often metabolites of each hydrogen number, and reactions involving those metabolites are used in the KEGG LIGAND database.
1	H1	1466		1	H2 + H8 ↔ H10	58
2	H2	1993		2	H1 + H8 + H29 ↔ H10 + H28	55
3	H3	610		3	H1 + H10 + H29 ↔ H12 + H28	53
4	H4	775		4	H1 + H6 + H29 ↔ H8 + H28	42
5	H5	266		5	H2 + H6 ↔ H8	40
6	H6	666		6	H12 + H16 ↔ H13 + H15	37
7	H7	501		7	H2 + H10 ↔ H12	35
8	H8	651		8	H1 + H10 + H30 ↔ H12 + H29	34
9	H9	461		9	H1 + H12 + H30 ↔ H2 + H12 + H29	33
10	H10	646		10	H1 + H4 + H29 ↔ H6 + H28	30
11	H11	333		11	H1 + H8 + H30 ↔ H10 + H29	28
12	H12	688		12	H2 + H14 ↔ H3 + H13	27
13	H13	400		13	H1 + H8 + H29 ↔ H2 + H8 + H28	27
14	H14	698		14	H2 + H4 ↔ H6	26
15	H15	498		15	H2 + H7 ↔ H9	26
16	H16	619		16	H2 + H13 ↔ H3 + H12	26
17	H17	134		17	H13 + H16 ↔ H14 + H15	26
18	H18	132		18	H1 + H6 + H29 ↔ H2 + H6 + H28	24
19	H19	102		19	H1 + 2 H30 ↔ H29 + H32	24
20	H20	320		20	H2 + H5 ↔ H3 + H4	24
21	H21	112		21	H14 + H16 ↔ 2 H15	22
22	H22	374		22	H1 + H8 + H30 ↔ H2 + H8 + H29	22
23	H23	128		23	H2 + H15 ↔ H3 + H14	21
24	H24	251		24	H10 + H16 ↔ H11 + H15	20
25	H25	79		25	H1 + H7 + H29 ↔ H9 + H28	20
26	H26	91		26	H2 + H7 ↔ H3 + H6	20
27	H27	50		27	H10 + H22 ↔ H12 + H20	20
28	H28	792		28	H1 + H10 + H30 ↔ H2 + H10 + H29	20
29	H29	1345		29	H1 + H12 + H30 ↔ H14 + H29	19
30	H30	822		30	H4 + H24 ↔ H28	19
31	H31	39		31	H1 + H10 + H29 ↔ H2 + H10 + H28	18
32	H32	197		32	H1 + H4 + H30 ↔ H6 + H29	17
33	H33	44		33	H1 + H29 + H30 ↔ H28 + H32	17
34	H34	82		34	H1 + H6 + H30 ↔ H8 + H29	17
35	H35	44		35	H2 + H16 ↔ H4 + H14	17
36	H36	392		36	H2 + H16 ↔ H3 + H15	16
37	H37	29		37	H2 + H8 ↔ H3 + H7	16
38	H38	198		38	H1 + H5 + H29 ↔ H7 + H28	15
39	H39	23		39	H2 + H32 ↔ H34	15
40	H40	149		40	H12 + H22 ↔ H14 + H20	15
41	H41	14		41	H2 + H8 ↔ H4 + H6	15
42	H42	139		42	H2 + H12 ↔ H14	15
43	H43	22		43	H1 + H30 + H44 ↔ H29 + H46	14
44	H44	133		44	H1 + H28 + H30 ↔ H29 + H30	14
45	H45	18		45	H2 + H10 ↔ H3 + H9	14
46	H46	142		46	H1 + H12 + H29 ↔ H14 + H28	14
47	H47	13		47	H1 + H6 + H30 ↔ H2 + H6 + H29	14
48	H48	67		48	H2 + H22 ↔ 2 H12	14
49	H49	7		49	H12 + H24 ↔ H14 + H22	14
50	H50	56		50	H1 + H7 + H30 ↔ H9 + H29	14
51	H51	9		51	2 H4 ↔ H8	14
52	H52	39		52	H2 + H9 ↔ H11	14
53	H53	5		53	H10 + H24 ↔ H14 + H20	14
54	H54	22		54	H2 + H44 ↔ H46	13
55	H55	10		55	H1 + H30 + H32 ↔ H2 + H29 + H32	13
56	H56	45		56	H4 + H6 ↔ H10	13
57	H57	2		57	H1 + H30 + H46 ↔ H2 + H29 + H46	13
58	H58	32		58	H1 + H22 + H30 ↔ H24 + H29	13
59	H59	3		59	H4 + H9 ↔ H6 + H7	13
60	H60	42		60	H2 + H5 ↔ H7	12
61	H61	6		61	H14 + H30 ↔ H20 + H24	12
62	H62	26		62	H1 + H7 + H30 ↔ H2 + H7 + H29	12
63	H64	19		63	H1 + H9 + H29 ↔ H11 + H28	12
64	H65	11		64	H1 + H30 + H32 ↔ H29 + H34	12
65	H66	21		65	H2 + H6 + H10 ↔ H6 + H12	11
66	H67	3		66	H1 + H4 + H29 ↔ H2 + H4 + H28	11
67	H68	21		67	H1 + H29 + H44 ↔ H28 + H46	11
68	H70	22		68	H1 + H9 + H29 ↔ H2 + H9 + H28	10
69	H72	18		69	H1 + H28 + H29 ↔ H28 + H30	10
70	H73	3		70	H6 + H12 ↔ 2 H9	10
71	H74	21		71	H2 + H40 ↔ H6 + H36	10
72	H75	2		72	2 H2 ↔ H4	10
73	H76	8		73	H1 + H16 + H30 ↔ H2 + H16 + H29	10
74	H77	6		74	H2 + H40 ↔ H42	10
75	H78	10		75	H13 + H15 ↔ 2 H14	10
76	H80	13		76	H2 + H11 ↔ H13	10
77	H82	3		77	H2 + H30 ↔ H32	9
78	H84	7		78	H1 + H14 + H30 ↔ H2 + H14 + H29	9
79	H85	5		79	H8 + H24 ↔ H14 + H18	9
80	H87	1		80	H4 + H7 ↔ H11	9
81	H88	4		81	H2 + H9 ↔ H3 + H8	9
82	H89	4		82	H1 + H13 + H29 ↔ H15 + H28	9
83	H90	4		83	H4 + H32 ↔ H36	9
84	H91	10		84	H2 + H9 ↔ H4 + H7	9
85	H92	3		85	H1 + H11 + H30 ↔ H13 + H29	9
86	H97	1		86	H1 + H23 + H30 ↔ H25 + H29	9
87	H100	2		87	H1 + H16 + H29 ↔ H2 + H16 + H28	9
88	H101	1		88	H6 + H22 ↔ H8 + H20	9
89	H102	1		89	H4 + H25 ↔ H13 + H16	9
90	H105	2		90	H1 + H30 + H46 ↔ H29 + H48	9
91	H115	1		91	H14 + H31 ↔ H21 + H24	9
92	H118	1		92	H9 + H16 ↔ H10 + H15	9
93	H122	1		93	H6 + H11 ↔ H8 + H9	9
94	H129	2		94	H31 + H42 ↔ H36 + H37	8
95	H130	2		95	H9 + H22 ↔ H11 + H20	8
96	H132	1		96	H1 + H7 + H29 ↔ H2 + H7 + H28	8
97	H142	3		97	H3 + H4 ↔ H7	8
98	H143	6		98	H12 + H15 ↔ H13 + H14	8
99	H154	1		99	H14 + H32 ↔ H22 + H24	8
100	H156	6		100	H1 + H29 + H32 ↔ H28 + H34	8
101	H157	3		101	H1 + H13 + H30 ↔ H15 + H29	8
				102	H4 + H16 ↔ H5 + H15	8
				103	H1 + H24 + H30 ↔ H26 + H29	8
				104	H7 + H38 ↔ H9 + H36	8
				105	H4 + H16 ↔ H20	8
				106	H3 + H15 + H40 ↔ H6 + H16 + H36	8
				107	H8 + H22 ↔ H10 + H20	8
				108	H2 + H58 ↔ H60	8
				109	H1 + H9 + H30 ↔ H11 + H29	8
				110	H20 + H38 ↔ H22 + H36	8
				111	H2 + H3 + H8 ↔ H2 + H11	8
				112	H2 + H3 + H4 ↔ H2 + H7	8
				113	H1 + H14 + H30 ↔ H16 + H29	7
				114	H2 + H42 ↔ H44	7
				115	H2 + H10 ↔ 2 H6	7
				116	H2 + H14 ↔ H4 + H12	7
				117	H6 + H13 ↔ H9 + H10	7
				118	H4 + H20 ↔ 2 H12	7
				119	H2 + H7 ↔ H4 + H5	7
				120	H2 + H12 ↔ 2 H7	7
				121	H1 + H14 + H29 ↔ H16 + H28	7
				122	H2 + H14 ↔ H7 + H9	7
				123	H1 + H15 + H30 ↔ H2 + H15 + H29	7
				124	H3 + H12 ↔ H4 + H11	7
				125	H1 + H29 + H46 ↔ H28 + H48	7
				126	H3 + H22 ↔ H12 + H13	7
				127	H20 + H46 ↔ H22 + H44	7
				128	H4 + H14 + H42 ↔ H8 + H16 + H36	7
				129	H2 + H15 ↔ H4 + H13	7
				130	H1 + H4 ↔ H5	7
				131	H1 + H29 + H42 ↔ H28 + H44	7
				132	H2 + H10 ↔ H4 + H8	7
				133	H1 + H18 + H30 ↔ H20 + H29	6
				134	H2 + H20 ↔ H4 + H18	6
				135	H13 + H22 ↔ H15 + H20	6
				136	H2 + H28 ↔ H4 + H26	6
				137	H2 + H4 ↔ 2 H3	6
				138	H2 + H3 ↔ H5	6
				139	H11 + H16 ↔ H12 + H15	6
				140	H1 + H5 + H30 ↔ H2 + H5 + H29	6
				141	H12 + 4 H36 ↔ 3 H38 + H42	6
				142	H2 + H18 ↔ H3 + H17	6
				143	H3 + H13 ↔ H4 + H12	6
				144	H4 + H42 ↔ H8 + H38	6
				145	H2 + H18 ↔ H8 + H12	6
				146	H1 + H5 ↔ H2 + H4	6
				147	H7 + H24 ↔ H14 + H17	6
				148	2 H7 ↔ H14	6
				149	H2 + H28 ↔ H30	6
				150	H20 + H26 ↔ H22 + H24	6
				151	H11 + H22 ↔ H13 + H20	6
				152	H2 + H3 + H11 ↔ H2 + H14	6
				153	H15 + H17 ↔ 2 H16	6
				154	H1 + H24 + H30 ↔ H2 + H24 + H29	6
				155	H21 + H42 ↔ H27 + H36	6
				156	H3 + H13 ↔ H5 + H11	6
				157	H1 + H29 + H34 ↔ H28 + H36	6
				158	H7 + H16 ↔ H8 + H15	6
				159	H9 + H24 ↔ H14 + H19	6
				160	H2 + H20 ↔ H22	6
				161	H1 + H12 + H29 ↔ H2 + H12 + H28	6
				162	H6 + H24 ↔ H14 + H16	6
				163	H11 + H24 ↔ H14 + H21	6
				164	H13 + H24 ↔ H14 + H23	6
				165	H2 + H3 + H9 ↔ H2 + H12	6
				166	H14 + H38 ↔ H16 + H36	6
				167	H2 + H46 ↔ H48	6
				168	H1 + H4 ↔ H2 + H3	6
				169	H1 + H22 + H30 ↔ H2 + H22 + H29	6
				170	H1 + H2 ↔ H3	5
				171	H2 + H56 ↔ H58	5
				172	H2 + H14 ↔ H3 + H4 + H9	5
				173	H12 + H38 ↔ H14 + H36	5
				174	H2 + H9 ↔ H5 + H6	5
				175	H7 + H22 ↔ H9 + H20	5
				176	H14 + H22 ↔ H16 + H20	5
				177	H1 + H3 + H29 ↔ H2 + H3 + H28	5
				178	H9 + H38 ↔ H11 + H36	5
				179	H2 + H19 ↔ H3 + H18	5
				180	H6 + H16 ↔ H7 + H15	5
				181	H1 + H2 + H30 ↔ 2 H2 + H29	5
				182	H6 + H16 ↔ H9 + H13	5
				183	H1 + H13 + H29 ↔ H2 + H13 + H28	5
				184	H2 + H12 ↔ H3 + H11	5
				185	H1 + H29 + H40 ↔ H6 + H28 + H36	5
				186	H2 + H25 ↔ H13 + H14	5
				187	H2 + H17 ↔ H3 + H16	5
				188	H22 + H38 ↔ H24 + H36	5
				189	H2 + H6 ↔ 2 H4	5
				190	H2 + H11 ↔ H3 + H10	5
				191	H1 + H11 + H29 ↔ H2 + H11 + H28	5
				192	H20 + H50 ↔ H22 + H48	5
				193	H1 + H26 + H30 ↔ H28 + H29	5
				194	H20 + H52 ↔ H22 + H50	5
				195	H1 + H20 + H30 ↔ H22 + H29	5
				196	H2 + H23 ↔ H12 + H13	5
				197	H4 + H14 ↔ H7 + H11	5
				198	H2 + H13 ↔ H4 + H11	5
				199	H2 + H48 ↔ H50	5
				200	H2 + H3 + H10 ↔ H2 + H13	5
				201	H2 + H12 ↔ H4 + H10	5
				202	H2 + H32 ↔ H12 + H22	5
				203	H2 + H26 ↔ H28	5
				204	H2 + H74 ↔ H36 + H40	5
				205	H2 + H38 ↔ H40	5
				206	H2 + H50 ↔ H52	5
				207	H1 + H16 + H29 ↔ H18 + H28	5
				208	H1 + H4 + H30 ↔ H2 + H4 + H29	5
				209	H2 + H14 ↔ H5 + H11	5
				210	H1 + H6 ↔ H2 + H5	4
				211	H2 + H66 ↔ H32 + H36	4
				212	H2 + H14 ↔ H16	4
				213	H1 + H3 + H29 ↔ H5 + H28	4
				214	2 H1 + H2 ↔ 2 H2	4
				215	H10 + H42 ↔ H16 + H36	4
				216	H1 + H28 + H30 ↔ H2 + H28 + H29	4
				217	H4 + H5 ↔ H9	4
				218	H1 + H9 + H30 ↔ 2 H2 + H7 + H29	4
				219	H7 + H17 ↔ H24	4
				220	H1 + H11 + H29 ↔ H13 + H28	4
				221	H5 + H22 ↔ H7 + H20	4
				222	2 H2 + H6 ↔ H3 + H7	4
				223	H4 + H14 + H80 ↔ H16 + H36 + H46	4
				224	H23 + H38 ↔ H25 + H36	4
				225	H4 + H14 + H44 ↔ H10 + H16 + H36	4
				226	H2 + H24 ↔ H12 + H14	4
				227	H2 + H20 ↔ H10 + H12	4
				228	H1 + H18 + H29 ↔ H20 + H28	4
				229	H2 + H68 ↔ H34 + H36	4
				230	H4 + H12 ↔ H16	4
				231	H6 + H42 ↔ H8 + H40	4
				232	H1 + H22 + H29 ↔ H24 + H28	4
				233	H2 + H3 + H6 ↔ H2 + H9	4
				234	H4 + H11 ↔ H7 + H8	4
				235	H4 + H27 ↔ H15 + H16	4
				236	H2 + H13 ↔ H5 + H10	4
				237	H20 + H48 ↔ H22 + H46	4
				238	H3 + H10 ↔ H13	4
				239	H1 + H29 ↔ H2 + H28	4
				240	H19 + H38 ↔ H21 + H36	4
				241	H2 + H38 ↔ H4 + H36	4
				242	H2 + H6 + H12 ↔ H6 + H14	4
				243	H2 + H6 ↔ H3 + H5	4
				244	H1 + H23 + H29 ↔ H25 + H28	4
				245	H1 + H29 + H38 ↔ H4 + H28 + H36	4
				246	H2 + H23 ↔ H3 + H22	4
				247	H2 + H27 ↔ H14 + H15	4
				248	H14 + H28 ↔ H20 + H22	4
				249	H3 + H8 ↔ H11	4
				250	H2 + H21 ↔ H10 + H13	4
				251	H6 + H27 ↔ H9 + H24	4
				252	H2 + H8 + H38 ↔ H12 + H36	4
				253	H2 + H28 ↔ H14 + H16	4
				254	H2 + H13 ↔ H6 + H9	4
				255	H2 + H21 ↔ H4 + H19	4
				256	H2 + H19 ↔ H8 + H13	4
				257	H3 + H25 ↔ H13 + H15	4
				258	H1 + H30 + H38 ↔ H29 + H40	4
				259	H1 + H3 + H10 + H29 ↔ H2 + H13 + H28	4
				260	H4 + H40 ↔ H6 + H38	4
				261	H2 + H42 ↔ H8 + H36	4
				262	H1 + H3 + H4 + H29 ↔ H2 + H7 + H28	4
				263	H17 + H22 ↔ H19 + H20	4
				264	2 H6 ↔ H12	4
				265	H36 + H44 ↔ H38 + H42	4
				266	H4 + H15 ↔ H6 + H13	4
				267	H15 + H18 ↔ H16 + H17	4
				268	H1 + H30 + H48 ↔ H29 + H50	4
				269	H2 + H11 ↔ H4 + H9	4
				270	H2 + H60 ↔ H62	4
				271	H2 + H20 ↔ H3 + H19	4
				272	H1 + H11 + H30 ↔ H2 + H11 + H29	4
				273	H1 + H30 + H42 ↔ H8 + H29 + H36	4
				274	H4 + H14 + H40 ↔ H6 + H16 + H36	4
				275	H2 + H11 ↔ H6 + H7	3
				276	H3 + H6 ↔ H9	3
				277	H16 + H62 ↔ H28 + H50	3
				278	H14 + 4 H36 ↔ 3 H38 + H44	3
				279	H15 + H40 ↔ H16 + H39	3
				280	H15 + H23 ↔ H16 + H22	3
				281	H36 + H39 ↔ H37 + H38	3
				282	H12 + H42 ↔ H18 + H36	3
				283	H2 + H24 ↔ H3 + H23	3
				284	H1 + H4 + H7 + H29 ↔ H2 + H11 + H28	3
				285	H13 + H143 ↔ H65 + H91	3
				286	H4 + H14 ↔ H5 + H13	3
				287	H14 + H40 ↔ H24 + H30	3
				288	H2 + H22 ↔ H24	3
				289	H1 + H26 + H30 ↔ H2 + H26 + H29	3
				290	H8 + H16 ↔ H9 + H15	3
				291	H1 + H30 + H42 ↔ H29 + H44	3
				292	H1 + H9 + H30 ↔ H2 + H9 + H29	3
				293	H1 + H5 + H30 ↔ H7 + H29	3
				294	2 H2 + H8 ↔ H3 + H9	3
				295	H15 + H29 ↔ H16 + H28	3
				296	H3 + H16 ↔ H4 + H15	3
				297	2 H8 ↔ H16	3
				298	H14 + H41 ↔ H24 + H31	3
				299	2 H2 + H16 ↔ 2 H3 + H14	3
				300	H3 + H15 + H55 ↔ H14 + H16 + H43	3
				301	H4 + H11 ↔ H15	3
				302	H1 + H15 ↔ H2 + H14	3
				303	H4 + H14 + H50 ↔ 2 H16 + H36	3
				304	H3 + H15 + H157 ↔ H3 + H16 + H156	3
				305	H3 + H15 + H65 ↔ H12 + H16 + H55	3
				306	H1 + H29 + H42 ↔ H8 + H28 + H36	3
				307	H2 + H22 ↔ H3 + H21	3
				308	H1 + H29 + H30 ↔ H2 + 2 H29	3
				309	H6 + H7 ↔ H13	3
				310	H1 + H30 + H40 ↔ H29 + H42	3
				311	H1 + H30 + H34 ↔ H2 + H29 + H34	3
				312	H1 + H2 + H29 ↔ H4 + H28	3
				313	H2 + H16 ↔ H18	3
				314	H1 + H20 + H30 ↔ 2 H2 + H18 + H29	3
				315	H14 + H38 ↔ H22 + H30	3
				316	H16 + H74 ↔ H28 + H62	3
				317	H2 + H64 ↔ H30 + H36	3
				318	H4 + H18 ↔ H6 + H16	3
				319	H16 + H60 ↔ H28 + H48	3
				320	H2 + H45 ↔ H7 + H40	3
				321	H1 + H3 ↔ H4	3
				322	3 H2 ↔ H2 + H4	3
				323	H1 + H17 + H29 ↔ H19 + H28	3
				324	H2 + H21 ↔ H6 + H17	3
				325	H6 + H14 ↔ H7 + H13	3
				326	H2 + H11 ↔ H3 + H4 + H6	3
				327	H2 + H42 ↔ H12 + H32	3
				328	H4 + H14 + H46 ↔ H12 + H16 + H36	3
				329	H3 + H15 + H21 ↔ H9 + H14 + H16	3
				330	H5 + H74 ↔ H36 + H43	3
				331	H1 + H2 + H29 ↔ 2 H1 + H30	3
				332	H8 + H17 ↔ H25	3
				333	H1 + H30 + H44 ↔ H2 + H29 + H44	3
				334	H1 + H21 + H30 ↔ H23 + H29	3
				335	H2 + H54 ↔ H56	3
				336	H20 + H27 ↔ H22 + H25	3
				337	H1 + H30 ↔ H2 + H29	3
				338	H1 + H29 + H40 ↔ H28 + H42	3
				339	2 H2 + 2 H5 ↔ 2 H7	3
				340	H4 + H12 ↔ H7 + H9	3
				341	H2 + H43 ↔ H5 + H40	3
				342	2 H1 + H8 ↔ H10	3
				343	H21 + H38 ↔ H23 + H36	3
				344	H1 + H30 + H56 ↔ H2 + H29 + H56	3
				345	H2 + H23 ↔ H10 + H15	3
				346	2 H1 + H25 + 2 H29 ↔ H2 + H27 + 2 H28	3
				347	H1 + H3 + H11 + H29 ↔ H2 + H14 + H28	3
				348	H19 + H22 ↔ H20 + H21	3
				349	H20 + H30 ↔ H22 + H28	3
				350	H4 + H15 ↔ H5 + H14	3
				351	H3 + H12 ↔ H15	3
				352	H4 + H14 + H38 ↔ H4 + H16 + H36	3
				353	H14 + H156 ↔ H27 + H143	3
				354	2 H1 + H10 ↔ H2 + H10	3
				355	H12 + H32 ↔ 2 H22	3
				356	H1 + H2 + H29 ↔ 2 H2 + H28	3
				357	H20 + H60 ↔ H22 + H58	3
				358	H2 + H70 ↔ 2 H36	3
				359	2 H2 + H3 ↔ H2 + H5	3
				360	H1 + H30 + H40 ↔ H2 + H29 + H40	3
				361	H4 + H22 ↔ H11 + H15	3
				362	H1 + H11 + 2 H30 ↔ H14 + 2 H29	3
				363	H20 + H23 ↔ H21 + H22	3
				364	H2 + H8 ↔ 2 H3 + H4	3
				365	H6 + H10 ↔ H7 + H9	3
				366	H2 + H18 ↔ H6 + H14	3
				367	H1 + 2 H30 ↔ H2 + H29 + H30	3
				368	3 H1 + H7 + 3 H29 ↔ 2 H2 + H9 + 3 H28	3
				369	H2 + H23 ↔ H25	3
				370	H16 + H72 ↔ H28 + H60	3
				371	H1 + H30 + H38 ↔ H4 + H29 + H36	3
				372	4 H2 + 2 H10 ↔ 4 H7	3
				373	H1 + H26 + H29 ↔ 2 H28	3
				374	H14 + H27 ↔ H19 + H22	3
				375	H2 + H15 ↔ H7 + H10	3
				376	H4 + H14 + H74 ↔ H16 + H36 + H40	3
				377	H36 + H42 ↔ H38 + H40	3
				378	H2 + H5 + H9 ↔ H3 + H13	2
				379	H4 + H84 ↔ H12 + H76	2
				380	H30 + H66 ↔ H36 + H60	2
				381	H2 + H68 ↔ H70	2
				382	H2 + H60 ↔ H30 + H32	2
				383	2 H1 + H5 + 2 H30 ↔ H2 + H7 + 2 H29	2
				384	H20 + H67 ↔ H22 + H65	2
				385	H1 + H30 + H54 ↔ H29 + H56	2
				386	H33 + H42 ↔ H35 + H40	2
				387	H4 + H68 ↔ H12 + H60	2
				388	H4 + H14 + H23 ↔ H7 + H16 + H18	2
				389	H1 + H29 + H56 ↔ H2 + H28 + H56	2
				390	H1 + H18 ↔ H2 + H17	2
				391	H15 + H19 ↔ H16 + H18	2
				392	H4 + H60 ↔ H12 + H52	2
				393	H3 + H9 ↔ H4 + H8	2
				394	H2 + H40 ↔ H3 + H39	2
				395	H9 + H14 ↔ H11 + H12	2
				396	2 H1 + H10 + 2 H30 ↔ H2 + H12 + 2 H29	2
				397	H8 + H36 ↔ H44	2
				398	H2 + H21 ↔ H8 + H15	2
				399	H36 + H47 ↔ H38 + H45	2
				400	H4 + H64 ↔ H68	2
				401	2 H1 + H10 ↔ H12	2
				402	H1 + H18 + H29 ↔ H2 + H18 + H28	2
				403	H14 + H36 ↔ H22 + H28	2
				404	H2 + H17 ↔ H7 + H12	2
				405	H1 + H30 + H44 ↔ H10 + H29 + H36	2
				406	H2 + H12 ↔ H3 + H4 + H7	2
				407	H1 + H3 + H30 ↔ H5 + H29	2
				408	H2 + H6 + H56 ↔ H8 + H56	2
				409	H2 + H15 ↔ H5 + H12	2
				410	H20 + H32 ↔ H22 + H30	2
				411	H5 + H42 ↔ H11 + H36	2
				412	H1 + H15 + H30 ↔ H17 + H29	2
				413	H6 + H23 ↔ H8 + H21	2
				414	H5 + H29 ↔ H6 + H28	2
				415	H22 + H42 ↔ 2 H32	2
				416	H2 + H33 ↔ H11 + H24	2
				417	H4 + H20 ↔ H8 + H16	2
				418	H5 + H40 ↔ H9 + H36	2
				419	H6 + H38 ↔ H8 + H36	2
				420	H5 + H38 ↔ H7 + H36	2
				421	H2 + H13 ↔ H15	2
				422	H2 + H52 ↔ H54	2
				423	H24 + H38 ↔ H26 + H36	2
				424	H1 + H4 + H6 + H29 ↔ 2 H2 + H8 + H28	2
				425	H1 + H3 + H8 + H29 ↔ H2 + H11 + H28	2
				426	2 H2 + 2 H4 ↔ 2 H6	2
				427	H11 + H44 ↔ H19 + H36	2
				428	H4 + H52 ↔ H12 + H44	2
				429	H36 + H68 ↔ H38 + H66	2
				430	H4 + H8 ↔ 2 H6	2
				431	H10 + H19 ↔ H29	2
				432	H2 + H6 + H38 ↔ H10 + H36	2
				433	H4 + H10 ↔ H14	2
				434	H4 + H31 ↔ H16 + H19	2
				435	H14 + H47 ↔ H24 + H37	2
				436	H3 + H14 + H40 ↔ H6 + H15 + H36	2
				437	H20 + H56 ↔ H22 + H54	2
				438	H15 + H38 ↔ H17 + H36	2
				439	H3 + H15 ↔ H4 + H14	2
				440	H20 + H28 ↔ H22 + H26	2
				441	H1 + H30 + H62 ↔ 2 H2 + H29 + H60	2
				442	H2 + H11 + H13 ↔ H11 + H15	2
				443	H1 + H23 + H30 ↔ H2 + H23 + H29	2
				444	2 H2 + H3 ↔ H3 + H4	2
				445	H1 + H6 + H14 + H30 ↔ H2 + H20 + H29	2
				446	H8 + H48 ↔ H10 + H46	2
				447	H30 + H38 ↔ H32 + H36	2
				448	H3 + H15 + H19 ↔ H7 + H14 + H16	2
				449	H4 + H14 + H66 ↔ H16 + H32 + H36	2
				450	H1 + H6 ↔ H7	2
				451	H1 + H3 + H9 + H29 ↔ H2 + H12 + H28	2
				452	H36 + H48 ↔ H38 + H46	2
				453	H1 + H29 + H50 ↔ H2 + H28 + H50	2
				454	H2 + H22 ↔ H7 + H17	2
				455	H1 + H23 + H30 ↔ 2 H2 + H21 + H29	2
				456	H11 + H38 ↔ H13 + H36	2
				457	H3 + H14 ↔ H4 + H13	2
				458	H4 + H13 ↔ H7 + H10	2
				459	H5 + H7 ↔ H12	2
				460	H4 + H36 ↔ H12 + H28	2
				461	2 H2 + H5 ↔ H2 + H7	2
				462	H36 + H78 ↔ H40 + H74	2
				463	H1 + H9 ↔ H10	2
				464	H4 + H76 ↔ H12 + H68	2
				465	H15 + H85 ↔ H16 + H84	2
				466	H1 + H3 + H9 + H30 ↔ H2 + H12 + H29	2
				467	H4 + H14 + H19 ↔ H7 + H14 + H16	2
				468	H2 + H11 ↔ H5 + H8	2
				469	H4 + H19 ↔ H23	2
				470	H4 + H14 ↔ H18	2
				471	H2 + H20 ↔ H9 + H13	2
				472	H7 + H13 ↔ H9 + H11	2
				473	H5 + H9 ↔ H6 + H8	2
				474	H13 + H38 ↔ H15 + H36	2
				475	H2 + H4 + H6 ↔ H4 + H8	2
				476	H3 + H22 ↔ H11 + H14	2
				477	H1 + H29 + H78 ↔ H28 + H80	2
				478	H4 + H14 + H21 ↔ H9 + H14 + H16	2
				479	H2 + H34 ↔ H17 + H19	2
				480	H1 + H8 + H30 ↔ H3 + H7 + H29	2
				481	H2 + H21 ↔ H9 + H14	2
				482	H36 + H40 ↔ 2 H38	2
				483	H1 + H40 ↔ H2 + H39	2
				484	H2 + H10 + H38 ↔ H14 + H36	2
				485	H1 + H30 + H37 ↔ H29 + H39	2
				486	H1 + H29 + H44 ↔ H10 + H28 + H36	2
				487	H15 + H21 ↔ H16 + H20	2
				488	H1 + H29 + H46 ↔ H2 + H28 + H46	2
				489	2 H9 + H32 ↔ H16 + 2 H17	2
				490	H1 + H30 + H34 ↔ 2 H2 + H29 + H32	2
				491	H6 + H21 ↔ H9 + H18	2
				492	H2 + H15 + H16 ↔ H3 + 2 H15	2
				493	H3 + H15 + H30 ↔ H9 + H16 + H23	2
				494	H4 + H23 ↔ H11 + H16	2
				495	H1 + H19 + H30 ↔ H21 + H29	2
				496	H4 + H26 ↔ H13 + H17	2
				497	H4 + H10 ↔ 2 H7	2
				498	H6 + H14 ↔ H9 + H11	2
				499	H1 + H30 + H50 ↔ H2 + H29 + H50	2
				500	H1 + H28 + H29 ↔ H2 + 2 H28	2
				501	H7 + H35 ↔ H9 + H33	2
				502	H1 + H10 + H29 ↔ 2 H2 + H8 + H28	2
				503	H2 + H28 ↔ 2 H15	2
				504	H2 + H10 ↔ H5 + H7	2
				505	H4 + H26 ↔ H14 + H16	2
				506	H14 + H25 ↔ H15 + H24	2
				507	H2 + H78 ↔ H80	2
				508	H4 + 2 H14 ↔ H7 + H9 + H16	2
				509	H1 + H16 + H30 ↔ H18 + H29	2
				510	H22 + H30 ↔ H23 + H29	2
				511	H1 + H7 ↔ H2 + H6	2
				512	H3 + H14 + H15 ↔ H7 + H9 + H16	2
				513	H1 + H30 + H48 ↔ H2 + H29 + H48	2
				514	H1 + H9 + H29 ↔ 2 H2 + H7 + H28	2
				515	H4 + H22 ↔ H6 + H20	2
				516	H3 + H8 ↔ H4 + H7	2
				517	H33 + H80 ↔ H35 + H78	2
				518	H14 + H40 ↔ H18 + H36	2
				519	H1 + H29 + H38 ↔ H28 + H40	2
				520	H2 + H17 ↔ H4 + H15	2
				521	H2 + H16 ↔ H7 + H11	2
				522	H7 + H15 ↔ H9 + H13	2
				523	H2 + H17 ↔ H8 + H11	2
				524	H4 + H16 ↔ H7 + H13	2
				525	H3 + H5 ↔ 2 H4	2
				526	2 H2 + 2 H10 ↔ 2 H12	2
				527	H20 + H35 ↔ H22 + H33	2
				528	H3 + H15 + H42 ↔ H8 + H16 + H36	2
				529	H1 + H18 + H30 ↔ H2 + H18 + H29	2
				530	H2 + H26 ↔ H13 + H15	2
				531	H2 + H9 + H40 ↔ H15 + H36	2
				532	H2 + H16 ↔ 2 H9	2
				533	H1 + H5 + H29 ↔ H2 + H5 + H28	2
				534	H4 + H15 ↔ H19	2
				535	H10 + 4 H36 ↔ 3 H38 + H40	2
				536	2 H2 + H6 ↔ H2 + H8	2
				537	H1 + H2 + H4 ↔ H2 + H5	2
				538	H1 + H10 ↔ H11	2
				539	H1 + H21 + H29 ↔ H23 + H28	2
				540	H1 + H14 + H30 ↔ H3 + H13 + H29	2
				541	2 H2 + H7 ↔ H2 + H9	2
				542	H1 + H20 + H30 ↔ H2 + H20 + H29	2
				543	H1 + H15 + H29 ↔ H17 + H28	2
				544	H4 + H23 ↔ H8 + H19	2
				545	H1 + H30 + H32 ↔ 2 H2 + H29 + H30	2
				546	H4 + H44 ↔ H10 + H38	2
				547	2 H7 + H32 ↔ H12 + 2 H17	2
				548	H20 + H58 ↔ H22 + H56	2
				549	2 H1 + H46 ↔ H48	2
				550	H20 + H72 ↔ H22 + H70	2
				551	2 H2 + 2 H14 ↔ 2 H16	2
				552	H2 + H24 ↔ 2 H13	2
				553	H7 + H15 ↔ H22	2
				554	H2 + H34 ↔ H36	2
				555	H6 + H10 ↔ H16	2
				556	H7 + H74 ↔ H36 + H45	2
				557	H2 + 2 H32 ↔ 2 H17 + H32	2
				558	H1 + H17 + H30 ↔ H19 + H29	2
				559	H2 + H14 ↔ 2 H8	2
				560	H1 + H30 + H68 ↔ H29 + H70	2
				561	H1 + H15 + H29 ↔ H2 + H15 + H28	2
				562	H4 + H7 ↔ H5 + H6	2
				563	H5 + H17 ↔ H22	2
				564	H2 + H4 + H38 ↔ H8 + H36	2
				565	H1 + H45 ↔ H2 + H44	2
				566	2 H20 + H31 ↔ 2 H22 + H27	2
				567	H4 + H44 ↔ H12 + H36	2
				568	2 H1 + H2 ↔ H1 + H3	2
				569	H1 + H29 + H62 ↔ 2 H2 + H28 + H60	2
				570	H1 + H2 + H8 ↔ H2 + H9	2
				571	H2 + H35 ↔ H14 + H23	2
				572	H33 + H44 ↔ H35 + H42	2
				573	2 H1 + H44 ↔ H46	2
				574	H4 + H14 + H39 ↔ H5 + H16 + H36	2
				575	H1 + H4 + 2 H28 ↔ H3 + 2 H29	2
				576	H1 + H30 + H34 ↔ H29 + H36	2
				577	H2 + H17 ↔ H19	2
				578	H16 + H50 ↔ H28 + H38	2
				579	H36 + H46 ↔ H40 + H42	2
				580	H2 + H24 ↔ H26	2
				581	H2 + H33 + H40 ↔ H35 + H40	2
				582	H4 + H38 ↔ H42	2
				583	H9 + H16 ↔ H11 + H14	2
				584	H15 + H38 ↔ H16 + H37	2
				585	2 H1 + H24 + 2 H30 ↔ H2 + H26 + 2 H29	2
				586	H14 + H54 ↔ H24 + H44	2
				587	H22 + H34 ↔ H56	2
				588	H2 + H14 ↔ H3 + H6 + H7	2
				589	H33 + H46 ↔ H35 + H44	2
				590	2 H1 + H11 + 2 H30 ↔ H15 + 2 H29	2
				591	H1 + H24 ↔ H2 + H23	2
				592	H20 + H24 ↔ 2 H22	2
				593	2 H1 + H7 ↔ H3 + H6	2
				594	H4 + H8 ↔ H12	2
				595	H1 + H20 + H29 ↔ H22 + H28	2
				596	3 H1 ↔ H1 + H2	2
				597	H1 + H27 + H30 ↔ H2 + H27 + H29	2
				598	H4 + H24 ↔ H13 + H15	2
				599	H2 + H6 + H26 ↔ H6 + H28	2
				600	H2 + H26 ↔ H4 + H24	2
				601	H12 + H14 ↔ 2 H13	2
				602	H3 + H14 ↔ H7 + H10	2
				603	H2 + H4 + H6 ↔ 2 H6	2
				604	H2 + H34 ↔ H12 + H24	2
				605	2 H1 + H22 + 2 H29 ↔ H2 + H24 + 2 H28	2
				606	2 H2 + H7 ↔ H3 + H8	2
				607	H4 + H28 ↔ 2 H16	2
				608	H3 + H9 ↔ H12	2
				609	H2 + H23 ↔ H11 + H14	2
				610	H4 + H35 ↔ H6 + H33	2
				611	H4 + H28 ↔ H12 + H20	2
				612	H1 + H8 ↔ H9	2
				613	2 H1 + H5 + 2 H29 ↔ H2 + H7 + 2 H28	2
				614	H2 + H19 ↔ H7 + H14	2
				615	H16 + H44 ↔ H26 + H34	2
				616	H1 + H3 + H11 + H30 ↔ H2 + H14 + H29	2
				617	H14 + H34 ↔ H22 + H26	2
				618	2 H1 + H3 ↔ H2 + H3	2
				619	H36 + H41 ↔ H38 + H39	2
				620	H1 + H5 ↔ H6	2
				621	H6 + H23 ↔ H10 + H19	1
				622	H2 + H7 + H13 ↔ H7 + H15	1
				623	H2 + H3 + H7 ↔ H12	1
				624	H1 + H29 + H32 ↔ 2 H17 + H28	1
				625	H16 + H20 ↔ 2 H18	1
				626	H4 + H44 ↔ H48	1
				627	H6 + H46 ↔ H12 + H40	1
				628	H2 + H18 ↔ H7 + H13	1
				629	H1 + H3 + H4 ↔ H2 + H6	1
				630	H2 + H25 ↔ H27	1
				631	H4 + H14 + H16 ↔ H7 + H11 + H16	1
				632	H14 + H100 ↔ H23 + H91	1
				633	2 H1 + 2 H2 + H8 ↔ 2 H7	1
				634	H20 + H44 ↔ H22 + H42	1
				635	H10 + H20 ↔ H30	1
				636	H2 + H22 + H53 ↔ H4 + H20 + H53	1
				637	H20 + H29 ↔ H22 + H27	1
				638	H2 + H27 ↔ H12 + H17	1
				639	2 H2 + 2 H42 ↔ 2 H44	1
				640	H2 + H65 ↔ H67	1
				641	2 H2 + H40 ↔ H8 + H36	1
				642	H2 + H16 ↔ H3 + H4 + H11	1
				643	H2 + H7 + H21 ↔ H2 + H28	1
				644	H3 + H6 + H15 ↔ H8 + H16	1
				645	H6 + H8 ↔ 2 H7	1
				646	2 H2 + H44 ↔ H12 + H36	1
				647	H11 + H16 ↔ H13 + H14	1
				648	H6 + H28 ↔ H9 + H25	1
				649	H2 + H47 ↔ H49	1
				650	H2 + H38 ↔ 2 H20	1
				651	H15 + H91 ↔ H16 + H90	1
				652	H10 + H15 ↔ H11 + H14	1
				653	H14 + H16 ↔ H30	1
				654	H3 + H15 + H17 ↔ H5 + H14 + H16	1
				655	H2 + H82 ↔ H36 + H48	1
				656	H1 + H23 + H29 ↔ H2 + H23 + H28	1
				657	H1 + H25 + H30 ↔ H2 + H25 + H29	1
				658	H4 + H6 + H8 ↔ H6 + H12	1
				659	H2 + H32 ↔ 2 H17	1
				660	H17 + H40 ↔ H21 + H36	1
				661	H2 + H10 + H14 ↔ H2 + H24	1
				662	H2 + H34 ↔ H10 + H26	1
				663	H3 + H22 ↔ H5 + H20	1
				664	H8 + H30 ↔ H38	1
				665	H4 + H24 ↔ H12 + H16	1
				666	H1 + H30 + H70 ↔ H29 + 2 H36	1
				667	H1 + H26 + H30 ↔ 2 H2 + H24 + H29	1
				668	H2 + H15 ↔ H17	1
				669	H4 + H51 ↔ H16 + H39	1
				670	H4 + H22 ↔ H10 + H16	1
				671	H7 + H15 ↔ 2 H11	1
				672	2 H1 + 2 H30 + H41 ↔ H2 + 2 H29 + H43	1
				673	H14 + H30 ↔ 2 H22	1
				674	2 H2 + H38 ↔ H6 + H36	1
				675	2 H1 + H28 ↔ H1 + H29	1
				676	H4 + H7 + H9 ↔ 2 H10	1
				677	H2 + H22 + H54 ↔ H4 + H20 + H54	1
				678	H2 + H4 + H16 ↔ H3 + H5 + H14	1
				679	H2 + H16 + H23 ↔ H3 + H15 + H23	1
				680	H2 + H3 + H16 ↔ H2 + H19	1
				681	2 H2 + 2 H6 ↔ 2 H8	1
				682	H1 + H10 + H30 ↔ 2 H6 + H29	1
				683	H36 + H50 ↔ H40 + H46	1
				684	H3 + H40 ↔ H43	1
				685	2 H1 + H30 ↔ H32	1
				686	H4 + H14 + H64 ↔ H16 + H30 + H36	1
				687	H2 + H23 + H29 ↔ H24 + H30	1
				688	H3 + H7 ↔ H10	1
				689	2 H1 + H3 ↔ H1 + H4	1
				690	2 H21 ↔ H42	1
				691	2 H1 + H41 ↔ H3 + H40	1
				692	H6 + H47 ↔ H8 + H45	1
				693	H2 + H45 ↔ H22 + H25	1
				694	2 H2 + H7 ↔ H4 + H7	1
				695	H9 + H11 ↔ 2 H10	1
				696	H16 + H76 ↔ H28 + H64	1
				697	H1 + H27 + H30 ↔ 2 H29	1
				698	H1 + H19 ↔ H2 + H18	1
				699	H12 + H16 ↔ 2 H14	1
				700	H1 + H26 + H30 ↔ 2 H14 + H29	1
				701	2 H2 + H18 ↔ 2 H3 + H16	1
				702	H4 + H18 ↔ H9 + H13	1
				703	H1 + H30 + H39 ↔ H2 + H29 + H39	1
				704	2 H2 + H28 ↔ H4 + H6 + H22	1
				705	H20 + H82 ↔ H22 + H80	1
				706	H14 + H55 ↔ H27 + H42	1
				707	H36 + H44 ↔ 2 H40	1
				708	H1 + H29 + 2 H88 ↔ H28 + 2 H89	1
				709	2 H1 + H42 ↔ H44	1
				710	H3 + H9 + H16 ↔ H3 + H10 + H15	1
				711	H1 + H24 + H30 ↔ 2 H2 + H22 + H29	1
				712	H2 + H17 ↔ H9 + H10	1
				713	H4 + H14 + H23 ↔ H11 + H14 + H16	1
				714	H2 + H3 + H14 ↔ H2 + H17	1
				715	H15 + H25 ↔ H16 + H24	1
				716	H3 + H15 + H34 ↔ H16 + H17 + H19	1
				717	H3 + H11 ↔ H14	1
				718	H1 + 2 H2 + H28 + 2 H88 ↔ H29 + 2 H90	1
				719	H1 + H4 + H10 ↔ H2 + H13	1
				720	H1 + H4 + H11 + H29 ↔ H2 + H15 + H28	1
				721	H20 + H34 ↔ H22 + H32	1
				722	H2 + H11 + H16 ↔ H3 + H4 + H22	1
				723	H1 + H24 + H29 ↔ H2 + H24 + H28	1
				724	H2 + H18 ↔ 2 H10	1
				725	5 H1 + 3 H30 ↔ 4 H2 + 3 H29	1
				726	H2 + H72 ↔ H36 + H38	1
				727	H33 + H58 ↔ H35 + H56	1
				728	H10 + H38 ↔ H12 + H36	1
				729	2 H2 + 2 H20 ↔ 2 H22	1
				730	H1 + H14 + H28 ↔ H14 + H29	1
				731	H2 + H22 ↔ H6 + H18	1
				732	2 H1 + H38 ↔ H40	1
				733	H14 + H50 ↔ H28 + H36	1
				734	2 H1 + H4 + 2 H29 ↔ H1 + H7 + 2 H28	1
				735	H24 + H32 ↔ H56	1
				736	H2 + H16 + H36 ↔ H4 + H14 + H36	1
				737	H3 + H15 + H38 ↔ H4 + H16 + H36	1
				738	H1 + H30 + H64 ↔ H29 + H66	1
				739	2 H2 + 2 H34 ↔ 2 H36	1
				740	H9 + H15 ↔ H24	1
				741	H1 + H9 + H11 + H29 ↔ H2 + H20 + H28	1
				742	H1 + H14 + H29 ↔ H2 + H14 + H28	1
				743	H2 + H38 + H40 ↔ H36 + H44	1
				744	H9 + H42 ↔ H15 + H36	1
				745	H1 + H30 + H45 ↔ H2 + H29 + H45	1
				746	H1 + H30 + H46 ↔ 2 H2 + H29 + H44	1
				747	H3 + H9 + H16 ↔ H4 + H10 + H14	1
				748	H7 + H13 ↔ 2 H10	1
				749	2 H2 + H11 ↔ H3 + H4 + H8	1
				750	H2 + H11 + H32 ↔ H11 + 2 H17	1
				751	H22 + H29 ↔ H23 + H28	1
				752	H2 + H9 + H38 ↔ H13 + H36	1
				753	H6 + H38 ↔ H44	1
				754	H1 + H25 + H30 ↔ H27 + H29	1
				755	H2 + H4 + H58 ↔ H28 + H36	1
				756	H1 + 2 H29 ↔ H28 + H31	1
				757	H1 + H16 + H23 ↔ H3 + H15 + H22	1
				758	H14 + H52 ↔ H24 + H42	1
				759	H3 + H15 + H18 ↔ H16 + H20	1
				760	H2 + H17 ↔ H6 + H13	1
				761	H1 + H29 ↔ H30	1
				762	4 H1 + H10 ↔ 2 H7	1
				763	H2 + H22 ↔ H10 + H14	1
				764	H4 + H8 + H14 ↔ 2 H5 + H16	1
				765	H2 + H19 + H29 ↔ H20 + H30	1
				766	H23 + H30 ↔ H24 + H29	1
				767	H2 + H52 ↔ H12 + H42	1
				768	H2 + H14 + H23 ↔ H16 + H23	1
				769	H4 + H14 + H18 ↔ H7 + H13 + H16	1
				770	H3 + H4 + H16 ↔ H4 + H5 + H14	1
				771	H1 + H29 + H46 ↔ 2 H2 + H28 + H44	1
				772	H4 + H97 ↔ H16 + H85	1
				773	2 H20 + H59 ↔ 2 H22 + H55	1
				774	H4 + H15 ↔ H8 + H11	1
				775	H2 + H22 ↔ H4 + H20	1
				776	H3 + H15 ↔ H5 + H13	1
				777	H14 + H29 ↔ H21 + H22	1
				778	H1 + H30 + H53 ↔ H29 + H55	1
				779	H2 + H6 + H58 ↔ H30 + H36	1
				780	2 H1 + H15 + 2 H30 ↔ H7 + H12 + 2 H29	1
				781	H14 + H18 ↔ 2 H16	1
				782	H2 + H5 + H15 ↔ H3 + H19	1
				783	H4 + H22 ↔ H12 + H14	1
				784	H1 + H19 + H29 ↔ H21 + H28	1
				785	H33 + H60 ↔ H35 + H58	1
				786	H1 + H29 + H70 ↔ H28 + H72	1
				787	2 H28 ↔ H56	1
				788	2 H14 + H52 ↔ 2 H22 + H36	1
				789	H2 + H30 ↔ H12 + H20	1
				790	2 H2 + H3 + H18 ↔ H9 + H16	1
				791	H2 + H26 ↔ H3 + H25	1
				792	H1 + H6 + H10 + H30 ↔ 2 H9 + H29	1
				793	2 H2 + H6 ↔ H4 + H6	1
				794	H14 + H38 ↔ H24 + H28	1
				795	2 H1 + H5 ↔ H1 + H6	1
				796	H2 + H16 ↔ H8 + H10	1
				797	H1 + H3 + H9 + H29 ↔ H14 + H28	1
				798	H12 + H20 ↔ 2 H16	1
				799	H1 + H4 + H12 + H30 ↔ H2 + H16 + H29	1
				800	H1 + H7 + H29 ↔ H1 + H8 + H28	1
				801	H1 + H4 + H5 + H29 ↔ H2 + H9 + H28	1
				802	H4 + H46 ↔ H8 + H42	1
				803	2 H2 + H3 + H12 ↔ H8 + H11	1
				804	H33 + H50 ↔ H35 + H48	1
				805	H2 + H15 ↔ H6 + H11	1
				806	H3 + H42 ↔ H9 + H36	1
				807	H16 + H53 ↔ H31 + H38	1
				808	H2 + H51 ↔ H17 + H36	1
				809	H6 + 3 H36 ↔ 3 H38	1
				810	H18 + H38 ↔ H20 + H36	1
				811	H14 + H45 ↔ H27 + H32	1
				812	2 H1 + 2 H6 ↔ 2 H7	1
				813	H3 + H21 ↔ 2 H12	1
				814	H2 + H4 + H7 ↔ H3 + H10	1
				815	2 H4 + 2 H10 ↔ 2 H14	1
				816	H1 + H29 + H64 ↔ H28 + H66	1
				817	H7 + H9 ↔ H16	1
				818	H2 + H5 + H6 ↔ H6 + H7	1
				819	H1 + H7 + H30 ↔ H3 + H6 + H29	1
				820	H1 + H12 ↔ H2 + H11	1
				821	H4 + 2 H22 ↔ H8 + 2 H20	1
				822	H2 + H7 + H9 ↔ H6 + H12	1
				823	H6 + 2 H17 ↔ H8 + H32	1
				824	H1 + H19 + H30 ↔ H2 + H19 + H29	1
				825	H15 + H132 ↔ H25 + H122	1
				826	2 H1 + H6 + 2 H30 ↔ H10 + 2 H29	1
				827	H2 + H45 ↔ H4 + H43	1
				828	H2 + H6 + H19 ↔ H6 + H21	1
				829	H10 + H38 ↔ H48	1
				830	2 H1 + H9 + 2 H29 ↔ H2 + H11 + 2 H28	1
				831	H6 + H22 + H50 ↔ H26 + H52	1
				832	2 H1 + H6 + 2 H29 ↔ H2 + H8 + 2 H28	1
				833	H3 + H20 ↔ H4 + H19	1
				834	H8 + H12 ↔ H9 + H11	1
				835	H2 + H53 ↔ H4 + H51	1
				836	H1 + H10 + H30 ↔ H3 + H9 + H29	1
				837	H2 + H49 ↔ H17 + H34	1
				838	H2 + H8 + H46 ↔ H10 + H46	1
				839	H1 + H8 ↔ H2 + H7	1
				840	H16 + H80 ↔ H31 + H65	1
				841	H1 + H3 + H32 ↔ H2 + 2 H17	1
				842	H2 + H37 ↔ H3 + H36	1
				843	2 H1 + H11 + H29 ↔ H2 + H12 + H28	1
				844	H28 + H38 ↔ H30 + H36	1
				845	H8 + H19 ↔ H27	1
				846	H7 + H14 ↔ H9 + H12	1
				847	2 H2 + H5 + H12 ↔ H2 + H9 + H10	1
				848	H12 + H35 ↔ H14 + H33	1
				849	2 H1 + H32 ↔ H34	1
				850	H16 + H56 ↔ H26 + H46	1
				851	H6 + H36 ↔ H42	1
				852	H20 + H57 ↔ H22 + H55	1
				853	H5 + H100 ↔ H16 + H89	1
				854	H1 + H30 + H51 ↔ H17 + H29 + H36	1
				855	4 H2 + H6 ↔ H14	1
				856	H2 + H8 + H13 ↔ H8 + H15	1
				857	H33 + H62 ↔ H35 + H60	1
				858	H14 + H26 ↔ H18 + H22	1
				859	H4 + H38 ↔ H6 + H36	1
				860	2 H2 + H8 ↔ 2 H3 + H6	1
				861	H2 + H8 + H12 ↔ H2 + H20	1
				862	H1 + H5 + H11 ↔ H3 + H14	1
				863	H7 + H20 ↔ H13 + H14	1
				864	H10 + H44 ↔ H18 + H36	1
				865	H1 + H4 + H14 + H30 ↔ H2 + H18 + H29	1
				866	H2 + H11 + 4 H36 ↔ 3 H38 + H43	1
				867	2 H2 + H56 ↔ H60	1
				868	H3 + H7 + H16 ↔ H4 + H8 + H14	1
				869	H2 + H62 ↔ H12 + H52	1
				870	2 H1 + H10 ↔ 2 H2 + H8	1
				871	H2 + H3 + 2 H16 ↔ H3 + H4 + 2 H15	1
				872	H36 + H52 ↔ 2 H44	1
				873	2 H14 + H76 ↔ 2 H24 + H56	1
				874	H2 + H5 + H10 ↔ H3 + H14	1
				875	H4 + H41 ↔ H9 + H36	1
				876	H3 + H11 + H16 ↔ H3 + H12 + H15	1
				877	H1 + H4 + H5 + H30 ↔ H2 + H9 + H29	1
				878	H4 + H70 ↔ H6 + H68	1
				879	H2 + H5 + H14 ↔ H2 + H19	1
				880	H4 + H78 ↔ H6 + H76	1
				881	H6 + H11 ↔ H17	1
				882	H16 + H65 ↔ H31 + H50	1
				883	H1 + H17 ↔ H2 + H16	1
				884	H6 + H91 ↔ H8 + H89	1
				885	H2 + H21 ↔ H3 + H20	1
				886	H1 + H16 + H28 ↔ H16 + H29	1
				887	H15 + H44 ↔ H16 + H43	1
				888	H4 + H14 + H41 ↔ H7 + H16 + H36	1
				889	H20 + H75 ↔ H22 + H73	1
				890	H1 + H4 + H32 ↔ H3 + 2 H17	1
				891	H36 + H70 ↔ H38 + H68	1
				892	H2 + H56 ↔ H12 + H46	1
				893	2 H1 + H11 + H30 ↔ H2 + H12 + H29	1
				894	H7 + H11 ↔ H8 + H10	1
				895	H1 + H5 + H9 ↔ H4 + H11	1
				896	H1 + H21 ↔ 2 H2 + H18	1
				897	H1 + H2 + H7 + H30 ↔ H3 + H8 + H29	1
				898	H16 + H61 ↔ H26 + H51	1
				899	2 H1 + H6 + 2 H30 ↔ H2 + H8 + 2 H29	1
				900	H3 + H14 + H15 ↔ 2 H16	1
				901	H2 + H46 ↔ H12 + H36	1
				902	H4 + H8 ↔ H5 + H7	1
				903	2 H2 + H9 ↔ H3 + H4 + H6	1
				904	H12 + H42 ↔ H22 + H32	1
				905	H29 + H45 ↔ H30 + H44	1
				906	2 H2 + H42 ↔ H10 + H36	1
				907	H2 + H30 ↔ H7 + H25	1
				908	3 H15 + H21 ↔ 3 H22	1
				909	H5 + H13 ↔ H7 + H11	1
				910	H2 + H16 + H21 ↔ H3 + H15 + H21	1
				911	H10 + H14 ↔ 2 H12	1
				912	H2 + H80 ↔ H36 + H46	1
				913	2 H2 + H6 + H16 ↔ H3 + H8 + H15	1
				914	H15 + H20 ↔ H16 + H19	1
				915	H8 + 2 H29 ↔ H10 + 2 H28	1
				916	H1 + H12 + H30 ↔ H3 + H11 + H29	1
				917	H3 + H15 + H18 ↔ H7 + H13 + H16	1
				918	H2 + H22 ↔ H9 + H15	1
				919	H4 + H18 ↔ H10 + H12	1
				920	H3 + H38 ↔ H5 + H36	1
				921	H2 + H87 ↔ H4 + H85	1
				922	H3 + 2 H15 ↔ H5 + H12 + H16	1
				923	H3 + H12 + H15 ↔ 2 H7 + H16	1
				924	H2 + H9 + H33 ↔ H9 + H35	1
				925	H5 + H17 ↔ H9 + H13	1
				926	H1 + H30 + H50 ↔ 2 H2 + H29 + H48	1
				927	H20 + H25 ↔ H22 + H23	1
				928	H1 + H3 + H8 + H30 ↔ H2 + H11 + H29	1
				929	H1 + H14 ↔ H2 + H3 + H10	1
				930	H1 + H23 ↔ H2 + H22	1
				931	H13 + H38 ↔ H24 + H27	1
				932	H3 + H4 + H15 + H38 ↔ H8 + H16 + H36	1
				933	H3 + H11 ↔ H5 + H9	1
				934	H2 + H22 ↔ H11 + H13	1
				935	H1 + H2 + H7 + H29 ↔ H3 + H8 + H28	1
				936	H13 + H17 ↔ H14 + H16	1
				937	H2 + H14 + H38 ↔ H18 + H36	1
				938	H3 + H12 + H15 ↔ H5 + H9 + H16	1
				939	H36 + H64 ↔ H38 + H62	1
				940	H1 + H30 + H32 ↔ 2 H17 + H29	1
				941	H15 + H130 ↔ H16 + H129	1
				942	2 H1 + H39 ↔ H5 + H36	1
				943	H1 + H15 + H29 ↔ H15 + H30	1
				944	6 H2 + 2 H34 ↔ 2 H40	1
				945	2 H2 + H42 ↔ H46	1
				946	H10 + H25 ↔ H13 + H22	1
				947	H20 + H59 ↔ H22 + H57	1
				948	H14 + H31 ↔ H22 + H23	1
				949	H1 + H29 + H50 ↔ H28 + H52	1
				950	H2 + H8 + H23 ↔ H10 + H23	1
				951	H33 + H54 ↔ H35 + H52	1
				952	H3 + H28 ↔ H15 + H16	1
				953	H8 + H9 ↔ H17	1
				954	H2 + H40 ↔ H5 + H37	1
				955	H1 + H12 + H29 ↔ 2 H7 + H28	1
				956	H36 + H70 ↔ H40 + H66	1
				957	H13 + H25 ↔ H15 + H23	1
				958	H4 + H35 ↔ H16 + H23	1
				959	2 H2 + H60 ↔ H64	1
				960	H2 + H62 ↔ H64	1
				961	H1 + H6 + H11 ↔ 2 H9	1
				962	2 H2 + H3 + H5 ↔ H5 + H7	1
				963	H2 + H6 + H16 ↔ H3 + H7 + H14	1
				964	H2 + H5 + H7 ↔ H3 + H11	1
				965	H33 + H40 ↔ H35 + H38	1
				966	H1 + H3 + H6 + H30 ↔ H2 + H9 + H29	1
				967	2 H2 + 2 H46 ↔ 2 H48	1
				968	H3 + H16 ↔ H5 + H14	1
				969	4 H1 + 2 H2 ↔ 4 H2	1
				970	2 H1 + 2 H29 + H44 ↔ H12 + 2 H28 + H36	1
				971	7 H2 + H72 ↔ 6 H3 + H9 + H59	1
				972	H1 + H8 + H29 ↔ H3 + H7 + H28	1
				973	H2 + H8 ↔ 2 H5	1
				974	H1 + H30 + H60 ↔ H29 + H62	1
				975	H8 + H42 ↔ H14 + H36	1
				976	H1 + H4 + H14 + H29 ↔ H2 + H18 + H28	1
				977	H5 + H14 ↔ H7 + H12	1
				978	H3 + H15 + H41 ↔ H16 + H17 + H26	1
				979	H6 + H18 ↔ 2 H12	1
				980	H33 + H66 ↔ H35 + H64	1
				981	H16 + H58 ↔ H28 + H46	1
				982	H16 + H36 ↔ 2 H26	1
				983	H15 + H36 ↔ H16 + H35	1
				984	H2 + H9 + H11 ↔ 2 H11	1
				985	H6 + H22 ↔ H12 + H16	1
				986	H32 + H38 ↔ H34 + H36	1
				987	H12 + H30 ↔ H42	1
				988	H2 + H3 + H18 ↔ H2 + H21	1
				989	H1 + H24 + H29 ↔ H26 + H28	1
				990	H2 + H16 + H38 ↔ H20 + H36	1
				991	H3 + H15 + H29 ↔ H16 + H31	1
				992	H2 + H12 + H38 ↔ H16 + H36	1
				993	H4 + H14 + H17 ↔ H7 + H12 + H16	1
				994	2 H1 + H7 + 2 H29 ↔ H2 + H9 + 2 H28	1
				995	H1 + H29 + H32 ↔ H2 + H28 + H32	1
				996	H1 + H29 + H54 ↔ H28 + H56	1
				997	H5 + H6 ↔ H11	1
				998	3 H1 + H2 + 3 H30 ↔ 4 H2 + 3 H29	1
				999	H16 + H38 ↔ H18 + H36	1
				1000	H33 + H64 ↔ H35 + H62	1
				1001	H2 + H76 ↔ H36 + H42	1
				1002	H14 + H43 ↔ H24 + H33	1
				1003	H14 + H142 ↔ H26 + H130	1
				1004	H2 + H72 ↔ H34 + H40	1
				1005	H2 + H84 ↔ H9 + H77	1
				1006	H3 + H12 + H15 ↔ H14 + H16	1
				1007	H15 + H37 ↔ H16 + H36	1
				1008	H2 + H40 ↔ H8 + H34	1
				1009	H2 + 4 H14 ↔ 4 H3 + H46	1
				1010	2 H1 + H2 + 2 H29 ↔ 2 H3 + 2 H28	1
				1011	H2 + 2 H3 ↔ H2 + H6	1
				1012	H4 + H16 ↔ H8 + H12	1
				1013	H2 + H78 ↔ H36 + H44	1
				1014	2 H2 + H15 ↔ H19	1
				1015	H3 + H15 + H36 ↔ H16 + H17 + H21	1
				1016	H12 + H17 ↔ H29	1
				1017	H1 + 2 H2 + H29 + 2 H88 ↔ H30 + 2 H90	1
				1018	H2 + H18 ↔ H9 + H11	1
				1019	H4 + H19 ↔ H7 + H16	1
				1020	H2 + H77 ↔ H13 + H66	1
				1021	H1 + H30 + H49 ↔ H29 + H51	1
				1022	H6 + H35 ↔ H8 + H33	1
				1023	3 H2 + H30 ↔ 2 H2 + H32	1
				1024	H15 + H30 ↔ H16 + H29	1
				1025	H4 + H9 ↔ H13	1
				1026	2 H2 + 2 H40 ↔ 2 H42	1
				1027	H33 + H37 ↔ 2 H35	1
				1028	H4 + H68 ↔ 2 H36	1
				1029	2 H2 + H21 ↔ H25	1
				1030	H1 + H29 + H48 ↔ H2 + H28 + H48	1
				1031	2 H2 + H15 ↔ H2 + H17	1
				1032	H10 + H35 ↔ H12 + H33	1
				1033	H6 + H18 ↔ H9 + H15	1
				1034	H9 + H25 ↔ H15 + H19	1
				1035	H6 + H8 ↔ H14	1
				1036	2 H1 + 2 H17 ↔ 2 H2 + H32	1
				1037	H2 + H20 ↔ H6 + H16	1
				1038	H33 + H39 ↔ H35 + H37	1
				1039	H12 + 2 H40 ↔ H20 + 2 H36	1
				1040	H2 + H12 ↔ H6 + H8	1
				1041	H1 + H16 + H29 ↔ H16 + H30	1
				1042	H1 + H17 + H30 ↔ H2 + H17 + H29	1
				1043	H2 + H6 + H11 ↔ H8 + H11	1
				1044	H3 + H8 ↔ H5 + H6	1
				1045	H2 + 2 H9 ↔ H6 + H14	1
				1046	H2 + H14 ↔ H6 + H10	1
				1047	H14 + H42 ↔ H20 + H36	1
				1048	H2 + 3 H20 ↔ H18 + 2 H22	1
				1049	H1 + H8 + H28 ↔ H8 + H29	1
				1050	H1 + H24 ↔ H3 + H22	1
				1051	H2 + H44 ↔ H10 + H36	1
				1052	H3 + H15 + H43 ↔ H9 + H16 + H36	1
				1053	H8 + H13 ↔ H10 + H11	1
				1054	H3 + H15 + H36 ↔ H7 + H16 + H31	1
				1055	H2 + H25 ↔ H12 + H15	1
				1056	H16 + H29 ↔ H19 + H26	1
				1057	2 H2 + H6 ↔ 2 H5	1
				1058	H1 + H30 + H47 ↔ H29 + H49	1
				1059	H2 + H5 + H32 ↔ H5 + 2 H17	1
				1060	H1 + H29 + H58 ↔ H28 + H60	1
				1061	H6 + H10 ↔ 2 H8	1
				1062	H1 + H29 + H30 ↔ H29 + H31	1
				1063	2 H2 + H6 + H16 ↔ 2 H3 + H6 + H14	1
				1064	3 H1 + 3 H30 + H36 ↔ 3 H29 + H42	1
				1065	H3 + H15 + H84 ↔ H9 + H16 + H77	1
				1066	H4 + H52 ↔ 2 H28	1
				1067	H2 + H29 ↔ H3 + H28	1
				1068	H2 + H10 + H13 ↔ H4 + H9 + H12	1
				1069	H2 + H6 + H8 ↔ 2 H8	1
				1070	H2 + H62 ↔ H18 + H46	1
				1071	H1 + H29 + H50 ↔ 2 H2 + H28 + H48	1
				1072	H2 + H31 ↔ H4 + H29	1
				1073	H33 + H56 ↔ H35 + H54	1
				1074	H1 + 2 H28 + H30 ↔ 2 H4 + H29 + H50	1
				1075	H17 + H30 ↔ H47	1
				1076	2 H20 + H48 ↔ 2 H22 + H44	1
				1077	H2 + H50 ↔ H16 + H36	1
				1078	H2 + H18 ↔ H20	1
				1079	H1 + H2 + H5 + H91 ↔ H9 + H90	1
				1080	H14 + H115 ↔ H24 + H105	1
				1081	H1 + H4 + H11 ↔ H3 + H13	1
				1082	H5 + H16 ↔ H21	1
				1083	H2 + H3 + H7 ↔ H2 + H10	1
				1084	2 H1 + H24 + 2 H29 ↔ H2 + H26 + 2 H28	1
				1085	H1 + H29 + H58 ↔ H28 + 2 H30	1
				1086	2 H4 + H24 ↔ 2 H16	1
				1087	H1 + H30 + H43 ↔ H29 + H45	1
				1088	H8 + 2 H30 ↔ H10 + 2 H29	1
				1089	H1 + 2 H30 ↔ 2 H2 + H28 + H29	1
				1090	H2 + H38 ↔ H18 + H22	1
				1091	H32 + H40 ↔ 2 H36	1
				1092	3 H2 + H16 ↔ 2 H3 + H16	1
				1093	H7 + H11 ↔ 2 H9	1
				1094	H1 + H7 + H13 + H29 ↔ H10 + H12 + H28	1
				1095	2 H1 + H6 ↔ H3 + H5	1
				1096	H4 + H26 ↔ H8 + H22	1
				1097	H2 + H29 ↔ H8 + H23	1
				1098	H1 + H30 + H36 ↔ H2 + H29 + H36	1
				1099	H14 + H23 ↔ H16 + H21	1
				1100	2 H1 + H29 ↔ H3 + H28	1
				1101	H1 + H6 + H14 + H29 ↔ H2 + H20 + H28	1
				1102	H2 + H20 ↔ H5 + H17	1
				1103	H3 + H13 + H16 ↔ H4 + 2 H14	1
				1104	2 H2 + H10 ↔ H2 + H12	1
				1105	H15 + H43 ↔ H16 + H42	1
				1106	H3 + H14 ↔ H6 + H11	1
				1107	H7 + H46 ↔ H17 + H36	1
				1108	2 H1 + H23 + 2 H29 ↔ H2 + H25 + 2 H28	1
				1109	H12 + H19 ↔ H14 + H17	1
				1110	H2 + 2 H4 + H42 ↔ 2 H6 + H40	1
				1111	H6 + H44 ↔ H10 + H40	1
				1112	H26 + H38 ↔ H28 + H36	1
				1113	H3 + H38 ↔ H41	1
				1114	H33 + H72 ↔ H35 + H70	1
				1115	2 H1 + H19 + 2 H29 ↔ H23 + 2 H28	1
				1116	H12 + 2 H22 ↔ H16 + 2 H20	1
				1117	H15 + H26 ↔ H16 + H25	1
				1118	2 H2 + H5 + H11 ↔ H2 + 2 H9	1
				1119	H2 + H21 ↔ H23	1
				1120	H12 + H32 ↔ H16 + H28	1
				1121	3 H1 ↔ H3	1
				1122	H1 + H29 + H39 ↔ H1 + H30 + H38	1
				1123	6 H2 + 2 H6 ↔ 4 H6	1
				1124	H10 + H22 ↔ H14 + H18	1
				1125	H1 + H3 + H4 + H30 ↔ H2 + H7 + H29	1
				1126	H3 + H23 ↔ 2 H13	1
				1127	H2 + H16 ↔ H5 + H13	1
				1128	H2 + H9 + H10 ↔ H2 + H19	1
				1129	H9 + H25 ↔ H11 + H23	1
				1130	H1 + H6 + H10 + H29 ↔ 2 H9 + H28	1
				1131	2 H2 + H7 + H16 ↔ H3 + H9 + H15	1
				1132	H2 + H11 + H16 ↔ H4 + H11 + H14	1
				1133	H2 + H92 ↔ H3 + H91	1
				1134	H2 + H13 ↔ H3 + 2 H6	1
				1135	H1 + H6 + H32 ↔ H5 + 2 H17	1
				1136	H2 + H38 ↔ H3 + H37	1
				1137	H2 + H5 + H23 ↔ H7 + H23	1
				1138	H15 + H50 ↔ H29 + H36	1
				1139	H14 + H37 ↔ H24 + H27	1
				1140	H1 + H30 + H37 ↔ H2 + H29 + H37	1
				1141	H14 + H129 ↔ H66 + H77	1
				1142	H2 + H21 + H42 ↔ H11 + H18 + H36	1
				1143	H8 + H32 ↔ H40	1
				1144	H16 + H46 ↔ H26 + H36	1
				1145	H4 + H28 ↔ H32	1
				1146	H3 + H7 + H16 ↔ H3 + H8 + H15	1
				1147	2 H4 + 2 H6 ↔ 2 H10	1
				1148	H2 + H7 + H8 ↔ H2 + H15	1
				1149	H2 + H7 + H12 ↔ H7 + H14	1
				1150	H15 + H101 ↔ H25 + H91	1
				1151	H7 + H40 ↔ H11 + H36	1
				1152	H2 + H52 ↔ H18 + H36	1
				1153	H3 + H36 ↔ H4 + H35	1
				1154	H1 + H29 + H66 ↔ H28 + H32 + H36	1
				1155	H14 + H19 ↔ H16 + H17	1
				1156	2 H2 + H16 ↔ H3 + H4 + H13	1
				1157	H2 + H4 + H40 ↔ H10 + H36	1
				1158	H15 + H22 ↔ H16 + H21	1
				1159	H4 + H21 ↔ H9 + H16	1
				1160	2 H2 + 2 H18 ↔ 2 H20	1
				1161	H2 + H72 ↔ H12 + H62	1
				1162	H2 + H24 ↔ H7 + H19	1
				1163	H4 + H14 + H52 ↔ H16 + H18 + H36	1
				1164	2 H2 + H5 ↔ H3 + H6	1
				1165	H1 + H29 + H52 ↔ H28 + H54	1
				1166	H1 + H19 ↔ H3 + H17	1
				1167	H10 + H21 ↔ H12 + H19	1
				1168	H1 + H30 + H46 ↔ H12 + H29 + H36	1
				1169	2 H1 + 2 H29 + H41 ↔ H2 + 2 H28 + H43	1
				1170	4 H1 + H44 ↔ H48	1
				1171	H3 + H23 ↔ H11 + H15	1
				1172	H4 + H14 + H16 ↔ H16 + H18	1
				1173	H2 + H29 ↔ H14 + H17	1
				1174	H14 + H33 ↔ H23 + H24	1
				1175	H4 + H73 ↔ H36 + H41	1
				1176	H12 + H25 ↔ H14 + H23	1
				1177	H4 + H46 ↔ H14 + H36	1
				1178	H2 + H44 ↔ H9 + H37	1
				1179	H6 + H19 ↔ H25	1
				1180	H8 + H13 ↔ H9 + H12	1
				1181	H7 + H25 ↔ H15 + H17	1
				1182	H2 + 2 H17 ↔ 2 H2 + H32	1
				1183	H1 + H9 ↔ H2 + H8	1
				1184	H2 + H18 + H38 ↔ H22 + H36	1
				1185	H20 + H64 ↔ H22 + H62	1
				1186	H2 + H64 ↔ H66	1
				1187	H1 + H29 + H30 ↔ H2 + H28 + H30	1
				1188	2 H16 + H72 ↔ 2 H26 + H52	1
				1189	H1 + H22 + H29 ↔ H2 + H22 + H28	1
				1190	H22 + H142 ↔ 2 H82	1
				1191	H14 + H35 ↔ H24 + H25	1
				1192	H1 + H19 + H30 ↔ 2 H2 + H17 + H29	1
				1193	H1 + H22 ↔ H23	1
				1194	2 H1 + H21 + 2 H61 ↔ H23 + 2 H61	1
				1195	H3 + H29 ↔ H5 + H27	1
				1196	H6 + H48 ↔ H14 + H40	1
				1197	H2 + H5 + H10 ↔ H2 + H15	1
				1198	H14 + H29 ↔ H19 + H24	1
				1199	H1 + 2 H9 ↔ H2 + H17	1
				1200	H5 + H9 ↔ H14	1
				1201	H20 + H74 ↔ H22 + H72	1
				1202	H16 + H47 ↔ H31 + H32	1
				1203	H7 + H66 ↔ H36 + H37	1
				1204	H1 + H21 + H30 ↔ H2 + H21 + H29	1
				1205	4 H1 + H10 ↔ H2 + H12	1
				1206	H3 + H15 + H49 ↔ H16 + H17 + H34	1
				1207	H20 + H54 ↔ H22 + H52	1
				1208	2 H16 + 2 H20 + H49 ↔ H21 + 2 H22 + 2 H28	1
				1209	H1 + H4 + H11 ↔ H2 + H14	1
				1210	H2 + H5 + H8 ↔ H2 + H13	1
				1211	2 H2 + H3 + H7 ↔ 2 H7	1
				1212	2 H1 + H7 ↔ H2 + H7	1
				1213	2 H2 + H14 ↔ 2 H9	1
				1214	H2 + H5 + H16 ↔ H3 + H20	1
				1215	H1 + H9 + H11 + H30 ↔ H2 + H20 + H29	1
				1216	H2 + H25 ↔ H7 + H20	1
				1217	H1 + H15 + H17 ↔ H10 + H23	1
				1218	H3 + H15 + H85 ↔ H10 + H16 + H77	1
				1219	H1 + H30 + H50 ↔ H29 + H52	1
				1220	H4 + H54 ↔ H6 + H52	1
				1221	H2 + H21 ↔ H7 + H16	1
				1222	2 H1 + 2 H30 + H44 ↔ H12 + 2 H29 + H36	1
				1223	H2 + H33 ↔ H14 + H21	1
				1224	H2 + H25 ↔ H4 + H23	1
				1225	H2 + H13 ↔ H7 + H8	1
				1226	H13 + H23 + H35 ↔ H15 + H23 + H33	1
				1227	H1 + H29 + H48 ↔ H28 + H50	1
				1228	H1 + 2 H7 + H29 ↔ 2 H8 + H28	1
				1229	2 H2 + 2 H9 ↔ 2 H11	1
				1230	H36 + H74 ↔ H44 + H66	1
				1231	H2 + H36 ↔ H38	1
				1232	H1 + H21 + H30 ↔ 2 H2 + H19 + H29	1
				1233	H14 + H42 ↔ H25 + H31	1
				1234	H16 + H28 ↔ H18 + H26	1
				1235	H16 + H31 ↔ H20 + H27	1
				1236	4 H1 ↔ 2 H2	1
				1237	H1 + H7 + H29 ↔ H3 + H6 + H28	1
				1238	H4 + H14 + H16 ↔ 2 H9 + H16	1
				1239	H9 + H11 + H15 ↔ H10 + H25	1
				1240	7 H4 + H92 ↔ 7 H12 + H36	1
				1241	H1 + H2 + H30 ↔ H4 + H29	1
				1242	H3 + H18 ↔ H7 + H14	1
				1243	H1 + H3 + H6 + H29 ↔ H2 + H9 + H28	1
				1244	H2 + 2 H13 ↔ 2 H3 + H22	1
				1245	H3 + H40 ↔ H7 + H36	1
				1246	H9 + H24 ↔ H10 + H23	1
				1247	2 H2 + H14 ↔ H2 + H16	1
				1248	H2 + H52 ↔ H4 + H50	1
				1249	2 H16 + H44 ↔ H24 + 2 H26	1
				1250	H9 + H39 ↔ H11 + H37	1
				1251	H2 + H15 ↔ H3 + H4 + H10	1
				1252	H16 + H30 ↔ H18 + H28	1
				1253	H6 + H12 ↔ H8 + H10	1
				1254	H24 + H42 ↔ H30 + H36	1
				1255	H9 + H40 ↔ H13 + H36	1
				1256	H1 + H30 + H58 ↔ H29 + 2 H30	1
				1257	H4 + H23 ↔ H12 + H15	1
				1258	H16 + H73 ↔ H28 + H61	1
				1259	3 H16 + H58 ↔ 3 H26 + H28	1
				1260	H16 + H33 ↔ H21 + H28	1
				1261	H4 + H72 ↔ H34 + H42	1
				1262	H4 + H48 ↔ H52	1
				1263	H6 + H49 ↔ H8 + H47	1
				1264	2 H2 + H40 ↔ H44	1
				1265	H14 + H19 ↔ H33	1
				1266	H36 + H51 ↔ H40 + H47	1
				1267	H12 + H14 ↔ H26	1
				1268	H1 + H5 + H32 ↔ H4 + 2 H17	1
				1269	2 H1 + H29 ↔ H1 + H30	1
				1270	H4 + H92 ↔ H12 + H84	1
				1271	H3 + H15 + H56 ↔ H16 + H17 + H41	1
				1272	H2 + H7 + H14 ↔ H2 + H21	1
				1273	H2 + H30 ↔ H15 + H17	1
				1274	2 H4 + H28 ↔ 3 H12	1
				1275	6 H2 + 2 H8 ↔ 4 H7	1
				1276	H1 + H29 + H56 ↔ H28 + H58	1
				1277	H3 + H16 + H27 ↔ H4 + H14 + H28	1
				1278	H1 + H34 ↔ H17 + H18	1
				1279	H3 + H15 + H19 ↔ H9 + H12 + H16	1
				1280	H2 + H4 + H16 ↔ 3 H2 + H16	1
				1281	H1 + H21 + H29 ↔ H6 + H17 + H28	1
				1282	H16 + H34 ↔ H24 + H26	1
				1283	H12 + H17 ↔ H13 + H16	1
				1284	H1 + H30 + H47 ↔ H2 + H29 + H47	1
				1285	H2 + H6 + H21 ↔ H6 + H23	1
				1286	2 H1 ↔ H2	1
				1287	H33 + H70 ↔ H35 + H68	1
				1288	H2 + H18 ↔ H4 + H16	1
				1289	H1 + H14 ↔ H5 + H10	1
				1290	2 H2 + H11 ↔ H2 + H13	1
				1291	H1 + H3 + H15 ↔ H2 + H17	1
				1292	H13 + H102 ↔ H24 + H91	1
				1293	H6 + H29 + H36 ↔ H9 + H24 + H38	1
				1294	H4 + H26 ↔ H30	1
				1295	H1 + H30 + H72 ↔ H2 + H29 + H72	1
				1296	H13 + H23 ↔ H15 + H21	1
				1297	H36 + H54 ↔ H38 + H52	1
				1298	H12 + H21 ↔ H13 + H20	1
				1299	H36 + H56 ↔ H38 + H54	1
				1300	2 H2 + H3 + H7 ↔ H2 + H12	1
				1301	H6 + H23 ↔ H9 + H20	1
				1302	H16 + H43 ↔ H28 + H31	1
				1303	H7 + H14 ↔ H8 + H13	1
				1304	H1 + H2 + H3 + H29 ↔ H2 + H5 + H28	1
				1305	H8 + H38 ↔ H46	1
				1306	H1 + H30 + H52 ↔ H4 + H29 + H50	1
				1307	2 H2 + 2 H14 ↔ H2 + 2 H15	1
				1308	H2 + H70 ↔ H72	1
				1309	H4 + H14 + H43 ↔ H9 + H16 + H36	1
				1310	H16 + H70 ↔ H28 + H58	1
				1311	H18 + H22 ↔ 2 H20	1
				1312	H2 + H14 + H33 ↔ H14 + H35	1
				1313	H1 + H2 + H28 ↔ 2 H1 + H29	1
				1314	H16 + H64 ↔ H28 + H52	1
				1315	H10 + H18 ↔ H12 + H16	1
				1316	H1 + H29 + H62 ↔ H28 + H64	1
				1317	H1 + H6 + H22 ↔ H9 + H20	1
				1318	H29 + H89 ↔ H30 + H88	1
				1319	3 H2 + H16 ↔ 3 H3 + H13	1
				1320	H15 + H66 ↔ H36 + H45	1
				1321	H5 + H24 ↔ H6 + H23	1
				1322	2 H1 + H5 + 2 H30 ↔ H9 + 2 H29	1
				1323	H13 + H22 ↔ H14 + H21	1
				1324	H5 + H11 ↔ H16	1
				1325	H15 + H24 ↔ H17 + H22	1
				1326	H12 + H25 ↔ H15 + H22	1
				1327	H4 + H17 ↔ H21	1
				1328	H1 + H5 + 2 H28 ↔ H4 + 2 H29	1
				1329	H14 + H154 ↔ H26 + H142	1
				1330	H1 + H30 + H70 ↔ H2 + H29 + H70	1
				1331	2 H2 + H43 ↔ H3 + H8 + H36	1
				1332	H36 + H60 ↔ H38 + H58	1
				1333	H36 + H52 ↔ H38 + H50	1
				1334	H1 + H30 + H56 ↔ H29 + H58	1
				1335	H12 + H44 ↔ H20 + H36	1
				1336	H1 + H29 + H68 ↔ H28 + H70	1
				1337	H4 + H33 ↔ H16 + H21	1
				1338	H5 + H8 ↔ H13	1
				1339	H9 + H14 ↔ H10 + H13	1
				1340	H8 + H18 ↔ H12 + H14	1
				1341	H2 + H28 ↔ H10 + H20	1
				1342	H36 + H58 ↔ H38 + H56	1
				1343	2 H1 + H7 + 2 H30 ↔ H2 + H9 + 2 H29	1
				1344	2 H6 + 2 H8 ↔ 2 H14	1
				1345	H1 + H30 + H38 ↔ H2 + H29 + H38	1
				1346	H16 + H38 ↔ H26 + H28	1
				1347	H36 + H62 ↔ H38 + H60	1
				1348	H2 + H12 + H13 ↔ H12 + H15	1
				1349	4 H4 ↔ 2 H8	1
				1350	H14 + H34 ↔ 2 H24	1
				1351	H2 + H7 + H23 ↔ H9 + H23	1
				1352	H15 + H62 ↔ H16 + H61	1
				1353	H1 + H30 + H52 ↔ H29 + H54	1
				1354	2 H1 + H19 + 2 H30 ↔ H23 + 2 H29	1
				1355	H20 + H31 ↔ H22 + H29	1
				1356	H1 + H29 + H70 ↔ H28 + 2 H36	1
				1357	H20 + H77 ↔ H22 + H75	1
				1358	H9 + H35 ↔ H11 + H33	1
				1359	H1 + 2 H21 + H30 ↔ 2 H2 + H29 + H40	1
				1360	2 H20 + H60 ↔ 2 H22 + H56	1
				1361	H16 + H61 ↔ H31 + H46	1
				1362	H2 + H19 ↔ H9 + H12	1
				1363	H3 + H15 + H51 ↔ H16 + H17 + H36	1
				1364	H1 + H30 + H40 ↔ H6 + H29 + H36	1
				1365	H1 + H5 + H19 ↔ H10 + H15	1
				1366	H1 + H13 + H30 ↔ H2 + H13 + H29	1
				1367	H14 + H118 ↔ H27 + H105	1
				1368	H2 + H6 + H8 ↔ 2 H2 + H12	1
				1369	H7 + H64 ↔ H35 + H36	1
				1370	H2 + H5 + H11 ↔ H3 + H15	1
				1371	2 H11 + 2 H13 + H40 ↔ 2 H22 + H44	1
				1372	H28 + H30 ↔ 2 H29	1
				1373	H1 + H9 + 3 H22 ↔ H16 + 3 H20	1
				1374	2 H1 + H72 ↔ H74	1
				1375	H2 + H14 + H32 ↔ H14 + 2 H17	1
				1376	H4 + H21 ↔ H25	1
				1377	H8 + H44 ↔ H10 + H42	1
				1378	H17 + H51 ↔ H32 + H36	1
				1379	H2 + H12 ↔ H5 + H9	1
