# Supplementary material for: Signatures of Arithmetic Simplicity in Metabolic Network Architecture
Source: PLoS Comput Biol. 2010 Apr 1;6(4):e1000725. doi: 10.1371/journal.pcbi.1000725 (PMC2848538; doi:10.1371/journal.pcbi.1000725)
Supplement: Table S8 — Metabolite and reaction usage from the KEGG nitrogen dataset (0.02 MB XLS) [file pcbi.1000725.s017.xls]

## Sheet: KEGG Nitrogen
	Nitrogen metabolite	Count			Nitrogen reaction	Count		A count of how often metabolites of each nitrogen number, and reactions involving those metabolites are used in the KEGG LIGAND database.
1	N1	583		1	2 N1 ↔ N2	157
2	N2	357		2	N1 + N2 ↔ N3	74
3	N3	193		3	N1 + N3 ↔ N4	35
4	N4	107		4	N1 + N5 ↔ N6	20
5	N5	203		5	2 N1 + N7 ↔ N2 + N7	20
6	N6	67		6	N1 + N4 ↔ N5	17
7	N7	120		7	2 N3 ↔ N6	14
8	N8	23		8	2 N1 + N5 ↔ N2 + N5	12
9	N9	19		9	2 N2 ↔ N4	11
10	N10	11		10	2 N5 ↔ N10	8
11	N11	3		11	N1 + N7 ↔ N8	8
12	N12	1		12	N1 + N4 ↔ N2 + N3	7
13	N13	2		13	N2 + N5 ↔ N7	7
14	N14	3		14	N1 + N2 + N5 ↔ N3 + N5	7
15	N15	3		15	N1 + N3 + N5 ↔ N4 + N5	6
16	N16	5		16	N1 + N3 ↔ 2 N2	5
17	N18	2		17	N1 + N5 + N7 ↔ N5 + N8	5
18	N21	2		18	N1 + N4 + N5 ↔ 2 N5	5
				19	2 N1 + N6 ↔ N2 + 2 N3	4
				20	N4 + N5 ↔ N9	4
				21	N2 + N5 + N7 ↔ N5 + N9	4
				22	2 N3 + N5 ↔ N5 + N6	4
				23	N2 + N8 ↔ N3 + N7	3
				24	2 N2 + N7 ↔ N4 + N7	3
				25	N2 + N6 ↔ N3 + N5	3
				26	N2 + 2 N5 ↔ N5 + N7	3
				27	N1 + N5 + N8 ↔ N5 + N9	3
				28	N2 + N7 ↔ N9	3
				29	4 N3 ↔ 2 N6	3
				30	N1 + N5 + N15 ↔ N5 + N16	2
				31	2 N1 + N2 ↔ N4	2
				32	N1 + N5 + N6 ↔ N5 + N7	2
				33	N1 + N2 + N7 ↔ N3 + N7	2
				34	N1 + N8 ↔ N2 + N7	2
				35	N2 + N4 ↔ N6	2
				36	3 N7 ↔ N7 + N14	2
				37	N3 + N6 ↔ N4 + N5	2
				38	2 N3 + N7 ↔ N6 + N7	2
				39	N3 + N6 ↔ N9	2
				40	N3 + N5 + N6 ↔ N5 + N9	2
				41	N5 + N11 ↔ N16	1
				42	N1 + N2 + N4 ↔ N2 + N5	1
				43	7 N1 + N4 ↔ N11	1
				44	N1 + N2 + 2 N7 ↔ N3 + 2 N7	1
				45	N1 + N6 ↔ N7	1
				46	N5 + N9 ↔ 2 N7	1
				47	N2 + N3 ↔ N5	1
				48	N2 + N21 ↔ N5 + N18	1
				49	N3 + N10 ↔ N6 + N7	1
				50	N1 + N15 ↔ N16	1
				51	N3 + N5 + N7 ↔ N5 + N10	1
				52	4 N1 + N4 ↔ 4 N2	1
				53	N3 + 2 N7 ↔ N7 + N10	1
				54	N2 + N6 ↔ 2 N4	1
				55	N1 + 4 N7 ↔ 3 N7 + N8	1
				56	2 N1 + N4 + 2 N5 ↔ N4 + 2 N6	1
				57	N5 + N16 ↔ N21	1
				58	N1 + N4 + N7 ↔ N5 + N7	1
				59	2 N1 + 2 N7 ↔ N2 + 2 N7	1
				60	N5 + N6 ↔ N11	1
				61	N1 + N3 + N7 ↔ N4 + N7	1
				62	N3 + 3 N5 ↔ 3 N6	1
				63	2 N4 ↔ N8	1
				64	N5 + N13 ↔ N18	1
				65	N1 + N7 + N13 ↔ N7 + N14	1
				66	N3 + N4 + N5 ↔ N5 + N7	1
				67	N5 + N7 ↔ N12	1
				68	3 N1 + 3 N5 ↔ N3 + 3 N5	1
				69	N3 + N4 ↔ N7	1
				70	2 N1 + N3 ↔ N2 + N3	1
				71	N1 + N6 ↔ N2 + N5	1
				72	4 N1 ↔ 2 N2	1
